# Supplementary material for: Geometric remapping of particle distributions in the Discrete Element Model for Sea Ice (DEMSI v0.0)
Source: Copernicus journal article supplement (doi:10.5194/gmd-2021-199), 2021-08-11
Supplement: Supplementary file [file gmd-2021-199-AC1-supplement.pdf]

# Response to reviewers of “Geometric remapping of particle distributions in the Discrete Element Model for Sea Ice (DEMSI v0.0)”

A. K Turner, K. J. Peterson, and D. Bolintineanu

December 6, 2021

We thank the reviewers for their comments and suggestions. We have replied to the comments below, with original reviewer comments in italics.

## 1 Response to reviewer 1 comments

### 1.1 Specific Comments

- *Line 205 mentions neighboring source elements. Are neighbors in this case defined as all of the source polygons that intersect with a single target polygon?*
  - Yes, this is how neighbor source elements are defined. For greater clarity, We have moved the line “If two source polygons jointly overlap with a particular destination polygon they are defined as being neighboring source elements.” to earlier in the manuscript.
- *Is equation (28) correct? Should the sum be over  $i$  instead of  $ij$ ? Also, ice thickness category  $k$  is listed on the left-hand side of the equation. Should it also be included on the right-hand side?*
  - We have changed the sum to be over  $i$  and made other subscript changes for clarity. We have also added the  $k$  and  $l$  indices to appropriate quantities on the right-hand side of equations 28-30.
- *Line 259 states that “the effective area is set to the polygon area  $A_{pj}$ ” Is this statement in conflict with equation (8)? Where the effective area of the target polygon is calculated.*
  - This is compatible as explained in the additional text added: “This is compatible with equation 8 since the values of effective area and concentration are not unique for representing the physically relevant quantity of sea ice area within an element, given by  $A_i = c_i e_i$ . Provided the area of sea ice within an element remains fixed and  $0 \leq c_i \leq 1$  and  $0 \leq e_i \leq A_p$ , the concentration and effective area can vary together without affecting the physical representation.”
- *Line 449 mentions “the final distribution is smooth with similar results to that obtained in section 4.2” Should it be exactly the same? And if so is it worth comparing the two results?*
  - These should not be exactly the same because the particles distribution prior to remapping in the first case is from uniform motion, while the second is from nonuniform motion resulting in gaps and overlaps between particle effective areas. To clarify we added the following line: “Exactly the same result is not expected as the distribution of particles for remapping is different and the remapping method tested in section 4.2 does not require the flux correction scheme. However, the similarity in the results indicates that the flux correction scheme works effectively and does not introduce significantly more numerical diffusion.”
- *Figure 11 shows lower ice concentration elements at the edge of the ice wake (northeast of the island). Is this expected? Or is this an artifact of the diffusive nature of the remapping?*

- Yes, this is expected. These elements have a lower concentration since these destination elements were only partially covered by sea ice. For clarity we added the following line: “Elements on the edge of the ice pack and the edge of the island wake have concentrations less than one, since during the remapping these elements were not fully covered by source elements.”
- *Were thickness distributions examined in any of the two-dimensional cases? For example, in the island case would we expect to see ice thickness growth as ice collides with the island (opposite of the wake side)?*
  - A ridging scheme is in development but has not been validated yet. Simulations here include only elastic repulsion between elements and no thickening of ice occurs in the windward side of the island. For clarity we have added the following text: “Since the contact model used here consists of elastic repulsion without a representation of ridging, ice does not build up on the windward side of the island.”

## 1.2 Technical Corrections

- *In the background discussion on pressure ridging, lines 31-42, could also mention two additional Hopkins manuscripts, (1) On the ridging of intact lead ice and (2) On the mesoscale interaction of lead ice and floes.*
  - We added the following text: “Hopkins (1994) developed a two-dimensional cross-sectional model of a single pressure ridge, which was used by Hopkins (1996) to derive a contact model for a two dimensional DEM sea-ice model representing the plastic deformation produced during ridge formation. This model was then used to derive sea-ice yield curves. Hopkins (2004), used the same contact model in sea-ice simulations where the ridging process was represented through a remapping scheme of overlapping converging neighboring elements.”
- *Line 133 mentions that “Source element  $i$  has its effective area polygon,  $P_i$ , advecting with it, ”. I assume this includes translation and rotation?*
  - Yes, we added “(including both translation and rotation)” to this line.
- *It would be helpful to add the  $x$  and  $y$  axis scales to Figure 5, 8, 11, and 12.*
  - We have added  $x,y$  scales to figures 5, 8, 11, 12.

## 2 Response to reviewer 2 comments

### 2.1 Major comments:

1. *Lines 32-33 (Capturing the relevant physics of this process using DEM sea ice models has proven to be a challenge): Id strongly recommend citing the works by Marnix van den Berg and colleagues, related to their non-smooth DEM (NDEM) developed at NTNU, in particular, <https://doi.org/10.1016/j.coldregions.2018.07.001> and <http://dx.doi.org/10.1016/j.marstruc.2019.01.011> (its not self-advertisement, Im not related to the work of NTNU group). One of several advantages of NDEM is that it produces realistic forces during simulations of compliant floe-floe and floe-structure contacts, for floes of any shape a feature very important from the point of view of problems discussed in the present manuscript (and, especially, for the future developments of DEMSI).*
  - We have added “A related recent development is the non-smooth DEM (NDEM) sea-ice model developed by van den Berg et al. (2018, 2019), which for floes of any shape reproduces realistic forces for compliant floe-floe interactions.” to this paragraph.
2. *Related to the previous comment: The contact forces and overlaps computed from the Hookean model are known to have several serious limitations, in particular they are extremely sensitive to the time step used in simulations and to the time stepping method used. Those issues are not the main focus in this manuscript, of course, but they should be mentioned.*

- We added the line “While the Hookean contact model has several limitations, such as sensitivity to the time step and to the time stepping method used, it is sufficient to demonstrate the efficacy of the remapping method.”.
3. *As far as I know, even if 2D simulations are performed in LAMMPS, the model assumes that the discrete elements are spheres, not disks. In particular, contact forces are computed for circular, not rectangular contact area, element mass is proportional to  $r^3$ , not  $r^2$ , etc. Did the authors implement disk shaped elements in their model and forgot to mention that in the text, or are the simulations performed with the original LAMMPS code? If the second is true, please state it clearly and explain the consequences.*
- We have indeed implemented changes to LAMMPS to allow for treatment of two-dimensional disks rather than spheres moving in a two-dimensional plane. First, as the reviewer correctly points out, the mass of elements by default is proportional to radius<sup>3</sup>. The new set density/disc command in LAMMPS addresses this, allowing the mass to be proportional to radius<sup>2</sup>. However, this is not particularly relevant for most DEMSI simulations, since the mass can be set independently and arbitrarily for individual elements. Second, the moment of inertia for two-dimensional simulations in LAMMPS was originally a default of  $0.4 \times \text{mass} \times \text{radius}^2$ , which corresponds to the moment of inertia of a sphere. It is now possible to use a value of  $0.5 \times \text{mass} \times \text{radius}^2$ , which corresponds to the moment of inertia of a cylinder about its axis (i.e. disc), using the new disc option to the LAMMPS verlet integrator (fix nve/sphere). Finally, we have continued to use circular rather than rectangular (or polygonal) elements for computational expediency, since DEMSI aims to enable long time-scale simulations for climate modeling; the issues with this approximation will be discussed in a separate future paper, as they are not strictly related to 2D vs 3D representations or remapping.
4. *Is the angular momentum equation in LAMMPS turned off? Only the linear momentum equation is mentioned in the text.*
- Angular momentum is included in the simulations solving the equations of motion. We expand the description of the momentum equations to include the angular momentum equation.
5. *After having read the whole manuscript and my own comments above, my conclusion is that the significant weaknesses of this work are mostly related to the particular DEM used to perform the computations illustrating the remapping method, rather than to the remapping method itself. Therefore, I have two suggestions:*
- (a) *The title of the manuscript is misleading, because it suggests that a new sea ice DEM is presented, which is not the case. In fact, it is the very opposite: the DEM used here is much more primitive than several published ones, including those cited in the introduction, and it is not suitable to simulate ridging processes due to the limitations of the very simple contact model used (mentioned above) and several other limitations of LAMMPS (not mentioned and, unfortunately if the authors are planning to use that model in the future hard or even impossible to overcome). I suggest changing the title to something like Geometric remapping of particle distributions for discrete element sea ice models, so that it is clear what the paper contains and what its strengths are. Note that the acronym DEMSI is not used even once in the main text! (only in the abstract and acknowledgements). I know that GMD requires a name for the model being presented, but here its the remapping algorithm that deserves a name, not the sea ice DEM!*
- We disagree with the reviewer on this point. We believe the title, “Geometric remapping of particle distributions in the Discrete Element Model for Sea Ice (DEMSI v0.0)”, does not imply that a whole new DEM model is presented, only that a remapping method is presented. This geometric remapping method is implemented as an integral part of the DEMSI code base, as available from the “code availability” section in the paper. We believe that, for the applications DEMSI is intended for, some form of remapping techniques will be an integral part of running a sea-ice DEM model. We are developing more physically appropriate contact

models for sea ice, which will be presented in the future, but believe the DEM contact model is only one aspect of the development work needed to make a successful sea-ice DEM model for the application DEMSI is designed for. We add the line “This remapping method forms part of a new sea-ice dynamical core, the Discrete Element Model for Sea Ice (DEMSI), currently under development for use in coupled Earth system models.” to the last paragraph of the introduction.

- (b) *State it clearly in the last part of the introduction that the performance of the new method is illustrated based on simple simulations with a DEM that can be replaced with a serious one later on, and that the limitations of the DEM are not very crucial for the cases analyzed (in fact, the first 1D and 2D tests with translation and/or rotation of elements do not require any momentum equations/contact models, do they?).*

- We add the following text to the final paragraph of the introduction: “This remapping method forms part of a new sea-ice dynamical core, the Discrete Element Model for Sea Ice (DEMSI), currently under development for use in coupled Earth system models. The test cases used here to illustrate the method use a greatly simplified DEM contact model which is sufficient to demonstrate the efficacy of the remapping method. Work is ongoing developing a contact model for DEMSI representing sea-ice dynamics and including a representation of sea-ice fracture and ridging.”

## 2.2 Minor, mostly technical comments:

1. *Lines 44-48: Id suggest changing collisions to contacts everywhere in this fragment, as not all contacts are of the collision-type (especially during ridging, of interest here). (The term collision detection actually comes from early molecular-dynamics type models, where the discrete elements were assumed infinitely rigid, so that each contact was by definition a short-lived collision.)*

- We have replaced “collision” with “contact” throughout.

2. *Lines 315-316: there are no empty elements, representing open water. Actually, why not? What happens when the ice from a given polygon disappears, is that element removed from the simulation? Would it be advantageous to have no-ice polygons? It is discussed briefly around line 380, but it is assumed that those effects are relevant at the ice edge only. What about situations when many open water patches are present within the ice cover? Would the conclusion regarding unimportance of open water elements remain the same?*

- Once an element contains no ice it is removed from the simulation. A major reason not to include empty elements is computational. If empty elements were included, the whole domain would have to be covered in elements and the number of elements in the simulation would be significantly larger, and the computational speed of the simulation significantly slower. We do not believe it would be advantageous to have empty elements - it is unclear what equation of motion these elements would obey (stationary?) or how they would interact with other elements. Given the minimal effect the addition of empty pseudo-elements has on the edge concentration we do not believe they would affect the calculation significantly in patches within the ice. We note that ice filled elements also have a fraction of open water associated with them. We modify this section to read: “For DEM sea-ice models, elements only exist where sea ice exists, with elements that loose all their ice being removed from the simulation. One advantage of this is that fewer elements are needed than Eulerian cells (which must cover the whole domain), increasing computational performance for the DEM model. Consequently, there are no empty elements representing open water to be included in tracer gradient calculations, or in the neighboring element tracer extrema used to limit those gradients.”

3. *(47) and line 348: The symbol  $c$  is used here for the drag coefficient, and has been used earlier as ice concentration.  $c_w$  is used for drag coefficient further in line 356.*

- We have added appropriate subscripts to the drag coefficients for clarity.

4. *Line 414: 500 m/s?*

- We rewrite the descriptions for the 1D and 2D remapping test cases in terms of the element translation distance per remapping, rather than element velocity, since this is the physically important quantity.

5. *Figure 5 and the following colour figures: explain in their captions what the colour scale shows.*

- We added “Ice concentration” to the color bars in Figures 5, 8, 11, and 12, and to the y axis of Figures 3, 6, and 9. We modified the sub-figure titles for Figure 4 clarifying what is plotted. We add “(fraction of elements covered in sea ice)” as a definition to ice concentration in the caption of Figure 5, and add ”sea-ice concentration” to the caption of Figure 8.

# Geometric remapping of particle distributions in the Discrete Element Model for Sea Ice (DEMSI v0.0)

Adrian K. Turner<sup>1</sup>, Kara J. Peterson<sup>2</sup>, and Dan Bolintineanu<sup>2</sup>

<sup>1</sup>Theoretical Division, Los Alamos National Laboratory, Los Alamos, NM, USA

<sup>2</sup>Sandia National Laboratories, Albuquerque, NM, USA

**Correspondence:** Adrian K. Turner (akt@lanl.gov)

**Abstract.** A new sea ice dynamical core, the Discrete Element Model for Sea Ice (DEMSI), is under development for use in coupled Earth system models. DEMSI is based on the discrete element method, which models collections of ice floes as interacting Lagrangian particles. In basin-scale sea ice simulations the Lagrangian motion results in significant convergence and ridging, which requires periodic remapping of sea ice variables from a deformed particle configuration back to an undeformed initial distribution. At the resolution required for Earth system models we cannot resolve individual sea ice floes, so we adopt the sub-gridscale thickness distribution used in continuum sea ice models. This choice leads to a series of hierarchical tracers depending on ice fractional area or concentration that must be remapped consistently. The circular discrete elements employed in DEMSI help improve the computational efficiency at the cost of increased complexity in the effective element area definitions for sea ice cover that are required for the accurate enforcement of conservation. An additional challenge is the accurate remapping of element values along the ice edge, the location of which varies due to the Lagrangian motion of the particles. In this paper we describe a particle-to-particle remapping approach based on well-established geometric remapping ideas that enforces conservation, bounds-preservation, and compatibility between associated tracer quantities, while also robustly managing remapping at the ice edge. One element of the remapping algorithm is a novel optimization-based flux correction that enforces concentration bounds in the case of non-uniform motion. We demonstrate the accuracy and utility of the algorithm in a series of numerical test cases.

## 1 Introduction

Sea ice, the frozen surface of the ocean at high latitudes, forms an important component of the Earth climate system. Sea ice moderates the exchange of heat, mass, and momentum between the ocean and the atmosphere. The high albedo of sea ice has a significant effect on planetary reflectivity, and can help drive the polar amplification of climate change through an albedo feedback mechanism (Ingram et al., 1989), while the rejection of salt during sea-ice formation helps drive the thermohaline circulation (Killworth, 1983). The sea ice components of current global climate models use a continuum Eulerian formulation, and use either structured grids (e.g. CICE: Hunke et al. (2015), or LIM3: Rousset et al. (2015)) or unstructured meshes (e.g. MPAS-Seaice: Petersen et al. (2019)). Continuum Lagrangian sea-ice models have also been developed, such as neXtSIM (Rampal et al., 2016) which uses a moving triangulation as its mesh. The Discrete Element Method (DEM) is an alternate

25 Lagrangian method where the motion and ~~eollisions~~-contacts of finite sized particles are simulated. Several DEM sea ice models have been developed for process scale simulations, such as for sea ice ridging and deformation (Hopkins, 1994), the interaction between sea ice and solid structures (e.g. Tuhkuri and Polojärvi, 2018), the interaction between sea ice and waves (e.g. Xu et al., 2012; Herman, 2017), floe clustering (Herman, 2011), and channel flow (e.g. Gutfraind and Savage, 1998). Basin scale DEM sea ice models have been developed as well (Hopkins, 2004), and have been used to study the formation of  
30 the floe size distribution through fracture processes between elements (Hopkins and Thorndike, 2006).

Ice convergence and ridging present a unique set of issues for sea-ice DEM models that are not present in traditional DEM applications. During ridging ice area is reduced as ice thickness increases. Capturing the relevant physics of this process using DEM sea ice models has proven to be a challenge. ~~In the work of Hopkins (2004), the authors represented~~ Hopkins (1994) developed a two-dimensional cross-sectional model of a single pressure ridge, which was used by Hopkins (1996) to derive a  
35 contact model for a two dimensional DEM sea-ice model representing the plastic deformation produced during ridge formation. This model was then used to derive sea-ice yield curves. Hopkins (2004), used the same contact model in sea-ice simulations where the ridging process was represented through a remapping scheme of overlapping converging neighboring elements. In this model, every 24 hours the spatial distribution of elements is remapped back to the initial distribution of elements. Elements that overlap thicken after remapping representing the ridging process. Without this remapping, element overlap would increase  
40 indefinitely, producing a highly interpenetrated element distribution for which determination of element contacts would be difficult, as would interpretation of the sea ice state at any particular point. Alternatively, instead of using overlapped elements to represent ridging, elements could be made to shrink instead. Elements with arbitrarily small radii, however, introduce computational challenges with regard to efficient contact searching, time step size, and contact model formulation (Hopkins, 2004; Shire et al., 2020). Both these considerations, therefore, require long duration DEM simulations of sea ice deformation  
45 to periodically perform a remapping of the model elements to an undeformed distribution. A related recent development is the non-smooth DEM (NDEM) sea-ice model developed by van den Berg et al. (2018, 2019), which for floes of any shape reproduces realistic forces for compliant floe-floe interactions.

Computational performance is another important consideration for long duration DEM sea ice simulations. One of the most computationally expensive parts of a DEM model is the detection of ~~eollisions~~-contact between neighboring elements. Hopkins  
50 (2004) use polygonal elements and so require a computationally expensive algorithm (Preparata and Shamos, 1985) to detect ~~the collision~~-contact between elements and to calculate the ~~collision point~~-Collision-contact point. Contact detection between circular elements, on the other hand, is much less computationally expensive since for circular elements only a comparison between the element separation and the element radii is needed to determine if ~~a collision has occurred~~elements are in contact. In this regard, in the work which follows, we explore how to represent sea ice in a Hopkins (2004)-like DEM model using more  
55 computationally efficient circular elements. Within this framework, we also investigate how to perform proper remapping of elements, necessitated by the ridging process and required for the successful development of a global DEM sea ice model performing long duration simulations.

Considerable research has gone into developing conservative and bounds-preserving remapping methods for transferring scalar quantities between two grids. In the geometric approach, a reconstruction of the conserved quantity is integrated over

60 intersections of overlapping cells between the source and target mesh. In the climate modeling community this class of algorithm has been specialized for remapping between structured and unstructured spherical grids (Jones, 1999; Ullrich et al., 2009). Similar remapping algorithms have been developed for use in Arbitrary Lagrangian-Eulerian methods (Margolin and Shashkov, 2003) as well as the remapping step of semi-Lagrangian or incremental remapping schemes for transport (Dukowicz and Baumgardner, 2000; Lipscomb and Hunke, 2001; Lipscomb and Ringler, 2005; Lauritzen et al., 2010). For second-order  
65 and higher remapping schemes, a form of limiting must be done to preserve physical bounds on the remapped field. Bounds preservation can be achieved through limiting the gradient of the reconstruction (Dukowicz and Baumgardner, 2000; van Leer, 1979), applying a flux-correction algorithm (Liska et al., 2010), or applying an optimization-based correction (Bochev et al., 2013, 2014).

In this paper we present a [remapping](#) method that builds on standard geometric remapping approaches while addressing  
70 the unique challenges associated with remapping for a DEM sea ice model using circular elements. These challenges include defining consistent areas for enforcing conservation, addressing monotonicity errors due to element overlap under non-uniform motion, and enabling accurate reconstructions at the ice edge. [This remapping method forms part of a new sea-ice dynamical core, the Discrete Element Model for Sea Ice \(DEMSI\), currently under development for use in coupled Earth system models. The test cases used here to illustrate the method use a greatly simplified DEM contact model which is sufficient to demonstrate  
75 the efficacy of the remapping method. Work is ongoing developing a contact model for DEMSI representing sea-ice dynamics and including a representation of sea-ice fracture and ridging.](#) In Section 2 we describe the representation of sea ice in our model and introduce an effective element area needed to represent sea ice with 100% ice concentration. In Section 3 we describe our remapping algorithm including a novel optimization-based flux correction for the case of non-uniform motion and methods for ensuring accurate remap at the ice edge. In Section 4 we present numerical examples that demonstrate the method  
80 is robust and achieves second-order accuracy, tracer compatibility, conservation, and bounds preservation.

## 2 Representation of sea ice with circular elements

While using circular elements in DEM models is computationally efficient, they present a unique challenge for the representation of sea ice. Unlike polygonal elements that can be made to completely tessellate a region (e.g. with a Voronoi tessellation), circular elements, in general, cannot completely cover a region, preventing them from directly representing sea ice cover with  
85 100% concentration. In order to represent 100% ice cover with circular elements we associate an effective area,  $e$ , with each element. This area, potentially larger than the geometric area of the circular element, represents the area of sea ice and open water associated with that element. We determine this initial effective element area from a radical Voronoi tessellation (Imai et al., 1985) of the elements. Also called a power, or Laguerre–Voronoi diagram, this is a Voronoi tessellation weighted by the element radius and with the element centers as the tessellation generator points. This tessellation results in elements that  
90 are contained completely within their polygons for element distributions that do not overlap (see Figure 1). We take the initial effective area for an element as the area of the radical Voronoi polygon associated with that element. Since the radical Voronoi



tessellation covers the whole domain, the effective element area can represent 100% ice cover. The radical Voronoi polygon associated with an element is carried with it as the element moves.

Over time sea-ice deformation and ridging reduces sea-ice area (while increasing sea-ice thickness and approximately con-  
 95 serving sea-ice volume). One way to represent this in a DEM sea ice model is to allow elements to overlap as they ridge, and to  
 concomitantly reduce the effective element area as they do. The radical Voronoi polygon associated with an element,  $P_i$ , can  
 then be handled in either of two ways. Firstly, the size of the polygon associated with the element,  $A_{P_i}$ , can be kept constant.  
 In this case  $e < A_{P_i}$  in general between remappings. Secondly, as the effective element area of an element decreases during  
 ridging the polygon can be decreased in size so that its area remains equal to the effective element area, i.e.  $e = A_{P_i}$  between  
 100 remappings. The remapping method described here will work with either methodology. We will examine ridging in DEM sea  
 ice models in a later work, but require the remapping scheme described here to periodically remap the element distribution back  
 to the initial Voronoi tessellation to ameliorate the effect of the element overlap associated with ridging during long duration  
 simulations.

Sea-ice models used in current global climate models use numerous interdependent tracer fields that form a complex hierar-  
 105 chy, with ice concentration,  $c$ , or fractional area of ice in an element, as the root tracer. Sea ice models typically employ an ice  
 thickness category distribution (e.g. Hunke et al., 2015; Rousset et al., 2015), where grid cell ice area is divided into a number  
 of categories, each representing sea ice of different thicknesses. The sum of fractional areas in each thickness category is the  
 total element ice concentration. For ice concentration less than 100%, the remaining area is assumed to be open water. Within  
 each category the ice is further divided into vertical layers each of which contain tracer fields. Considering both categories and  
 110 layers, MPAS-Seaice, for example, utilizes 23 different tracer fields for a typical physics simulation without biogeochemistry.  
 Biogeochemistry uses many more additional tracers. Any remapping method must remap this complex tracer hierarchy in a  
 computationally efficient manner, as well as ensuring that the sum of ice concentrations across thickness categories per element  
 after remapping is bounded between 0 and 1.

Another desirable property of the remapping scheme is conservation of the appropriate conserved quantities. The effective  
 115 area,  $e$ , provides a means to define conserved quantities that is consistent for a representation of sea ice with 100% ice con-  
 centration. For example, given ice concentration,  $c$ , ice thickness,  $h$ , and ice enthalpy,  $q$ , in element  $i$  quantities that must be  
 conserved during remapping are the total ice area per ice thickness category,

$$\mathcal{A}_k = \sum_i e_i c_{ik}, \quad (1)$$

the total ice volume per ice thickness category

$$120 \quad \mathcal{V}_k = \sum_i e_i c_{ik} h_{ik}, \quad (2)$$

and the total ice energy per ice thickness category and ice layer

$$\mathcal{Q}_{kl} = \sum_i e_i c_{ik} h_{ik} q_{ikl}, \quad (3)$$

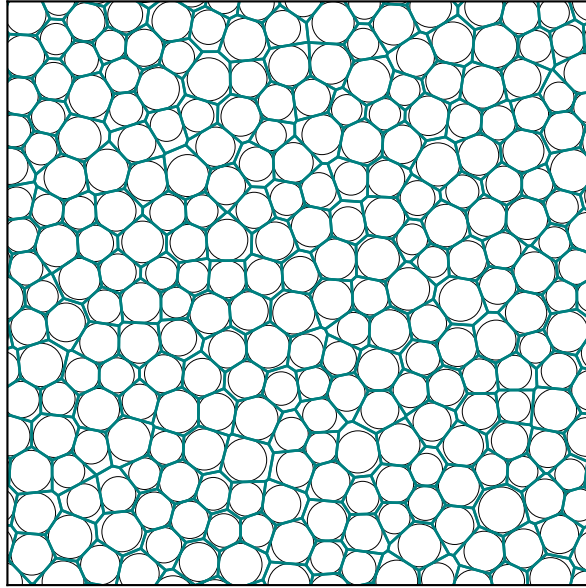

**Figure 1.** Example of an element distribution generated with the algorithm of Liang et al. (2015) showing the circular elements (*grey*), and the radical Voronoi tessellation (*green*).

where each thickness category within an element is labelled by the  $k$  index, and ice layers within a thickness category by the  $l$  index. In the remapping implementation we distinguish between primitive tracer variables, such as thickness and enthalpy, and  
125 conserved quantities, such as volume and energy.

### 3 Geometric remapping implementation

Several properties are desirable in tracer remapping schemes:

- *Conservation*: A remapping scheme should preserve conservation of the appropriate quantities. Conservation of mass and energy are very important for long-term global climate simulations.
- 130 – *Accuracy*: Since first order schemes are very numerically diffusive, the method should be at least second order accurate in space.
- *Monotonicity*: The method should preserve monotonicity of the tracer fields so no new extrema are generated in these fields by remapping.
- *Compatibility*: The method should ensure that no new extrema are created when the primitive tracer field is diagnosed  
135 from the remapped conserved field, that is, both the primitive and conserved variables are consistently bounds-preserving.
- *Computational efficiency*: The method should be computationally efficient for many tracers.

The geometric based remapping scheme proposed here satisfies all these requirements. The method proposed is based partly on the incremental remapping transport algorithm used for sea-ice transport in CICE and MPAS-Seaice (Dukowicz and Baumgardner, 2000; Lipscomb and Hunke, 2001). The scheme for remapping a source element distribution (indexed by  $i$ ) to a destination element distribution (indexed with  $j$ ) is described below. This remapping method is used within a sea ice simulation to periodically remap a deformed sea ice element (source) distribution to an undeformed (destination) distribution, after which the simulation is restarted. Source element  $i$  has its effective area polygon,  $P_i$ , advecting with it ([including both translation and rotation](#)), while the fixed destination element  $j$  has its effective area polygon,  $P_j$ , associated with it. Both polygons are convex. The remapping method is based on the polygon,  $P_{ij}$ , associated with the geometric overlap between the  $P_i$  and  $P_j$  polygons, which is also convex, and consists of transferring quantities associated with  $P_{ij}$  to  $P_j$ . Hence, a conserved quantity  $Z_i$  on the source polygons is remapped to  $P_j$  as

$$Z_j = \sum_i Z_{ij} \quad (4)$$

where  $Z_{ij}$  is the part of  $Z_i$  in the intersection polygon  $P_{ij}$  and the sum is over the source element polygons,  $P_i$ , that overlap the destination polygon,  $P_j$ . Since the destination polygons tessellate the whole domain every part of all the  $Z_i$  values, represented in the  $Z_{ij}$  values, are transferred to a destination polygon ensuring conservation of  $Z$ .

For a first order method, where a tracer,  $t_i$ , is assumed constant within the  $P_i$  polygons,

$$Z_{ij} = t_i e_{ij} \quad (5)$$

where  $e_{ij}$  is the effective area associated with the overlap polygon  $P_{ij}$  and is given by the fractional area of the overlap as

$$e_{ij} = e_i \frac{A_{P_{ij}}}{A_{P_i}} \quad (6)$$

where  $A_{P_i}$  denotes the area of the  $P_i$  polygon, and recall that  $e_i$  is the effective area of element  $i$  based on tessellation of the initial element configuration. For a second order method, with the tracer  $t_i(\mathbf{x})$  represented as a linear function of position,

$$Z_{ij} = \frac{e_{ij}}{A_{P_{ij}}} \int_{A_{P_{ij}}} t_i(\mathbf{x}) dA. \quad (7)$$

The set of source elements does not necessarily fill the entire domain, as some portions of the domain can be made up of open water. The set of destination polygons, however, form a complete tessellation of the domain without gaps or overlap, since for conservation every part of the  $P_i$  polygons must overlap with a  $P_j$  polygon exactly once.

The major steps of the remapping method are described below:

1. Determine overlap polygons,  $P_{ij}$ , between the source ( $P_i$ ) and destination ( $P_j$ ) polygons and remap effective element area.
2. Compute linear reconstructions of average tracer fields on source elements based on tracer values in neighboring elements. The gradients in the reconstruction are limited to ensure monotonicity of the remapped fields in the case of uniform motion.

3. Integrate the conserved variables over the intersection polygons using the linear reconstructed tracer fields and aggregate in the destination polygons.
4. Enforce bounds preservation for remapped effective area and tracers using an optimization-based flux correction.

170 These steps are described in more detail in the following sections.

### 3.1 Polygon intersections and remapped area

In the first step of the algorithm, the intersection polygons,  $P_{ij}$ , are calculated using the algorithm of Preparata and Shamos (1985). In order to avoid the large computational cost of calculating the intersection polygon for every source and destination polygon pair, only destination polygons that are close enough to source polygons to have potential overlap are included in the search. This is implemented with a link-cell method (Hockney et al., 1974; Plimpton, 1995).

175 Unlike for the discrete element application described here, when computing intersections between two well-defined grids that cover the same domain, the sum of the intersections will be equal to the domain area. Each destination grid cell will also be entirely covered by source grid cells so that the sum of the source intersections of a destination grid cell will equal the destination grid cell area. For our discrete element application, if the motion leading to the deformed element distribution is non-uniform there may be gaps and overlaps between the source polygons used to compute the intersections. Additionally, near the ice edge there will be destination polygons that are only partially covered by source polygons. To account for this, we compute a remapped effective area,  $e_j$ , given by

$$e_j = \sum_i e_{ij} = \sum_i \frac{A_{P_{ij}}}{A_{P_i}} e_i. \quad (8)$$

185 Recall that  $e_i$  may not be equivalent to the effective polygon area associated with element  $i$  due to area changes from ridging. The remapped effective area  $e_j$  will, in general, not equal the destination element effective area  $A_{P_j}$  and in some cases may exceed the destination element effective area. The optimization-based flux algorithm described in Section 3.4 is used to correct the remap effective area to ensure  $e_j \leq A_{P_j}$  and correct tracer values with the computed area fluxes to enforce monotonicity while maintaining conservation. In the case of uniform motion there are no area changes due to ridging and the remapped effective area simplifies such that  $e_i$  is equal to  $A_{P_i}$  and  $e_j$  will only differ from  $A_{P_j}$  along the ice edge.

### 190 3.2 Linear tracer reconstruction

As the first step in remapping the tracers, a mean-preserving linear reconstruction of the tracer fields,  $t_p(\mathbf{r}) \underline{t}_p^p(\mathbf{r})$ , is made in each polygon of the source element distribution. For the concentration,  $c$ , thickness,  $h$ , and enthalpy,  $q$ , the reconstructions are

$$\underline{c}_p^p(\mathbf{r}) = c + \alpha_c \nabla c \cdot (\mathbf{r} - \bar{\mathbf{r}}), \quad (9)$$

$$195 \quad \underline{h}_p^p(\mathbf{r}) = h + \alpha_h \nabla h \cdot (\mathbf{r} - \tilde{\mathbf{r}}), \quad (10)$$

and

$$q_{\underline{p}}^P(\mathbf{r}) = q + \alpha_q \nabla q \cdot (\mathbf{r} - \hat{\mathbf{r}}) \quad (11)$$

where  $\mathbf{r} = (x, y)$  is the position vector within the element polygon,  $\nabla c$ ,  $\nabla h$ , and  $\nabla q$  are estimates of the tracer gradients for the  $c$ ,  $h$ , and  $q$  tracers in the source polygons, and  $\alpha_c$ ,  $\alpha_h$ , and  $\alpha_q$  are limiting coefficients for the  $c$ ,  $h$ , and  $q$  tracers that enforce  
 200 monotonicity. A linear tracer reconstruction ensures second-order spatial accuracy of the remapping. To satisfy conservation of  $\mathcal{A}$ ,  $\mathcal{V}$ , and  $\mathcal{Q}$ , the reconstructed tracer fields must equal the known cell-averaged tracer values ( $c$ ,  $h$ , and  $q$ ) when integrated over the source polygons so that

$$e \frac{1}{A} \int_A c_{\underline{p}}^P(\mathbf{r}) dA = ce, \quad (12)$$

$$205 \quad e \frac{1}{A} \int_A c_{\underline{p}}^P(\mathbf{r}) h_{\underline{p}}^P(\mathbf{r}) dA = che, \quad (13)$$

and

$$e \frac{1}{A} \int_A c_{\underline{p}}^P(\mathbf{r}) h_{\underline{p}}^P(\mathbf{r}) q_{\underline{p}}^P(\mathbf{r}) dA = chqe. \quad (14)$$

This requires that (Lipscomb and Hunke, 2001)

$$\bar{\mathbf{r}} = \frac{1}{A} \int_A \mathbf{r} dA, \quad (15)$$

210

$$\tilde{\mathbf{r}} = \frac{1}{cA} \int_A c_{\underline{p}}^P(\mathbf{r}) \mathbf{r} dA, \quad (16)$$

and

$$\hat{\mathbf{r}} = \frac{1}{chA} \int_A c_{\underline{p}}^P(\mathbf{r}) h_{\underline{p}}^P(\mathbf{r}) \mathbf{r} dA. \quad (17)$$

Tracer gradients for a source element are calculated as a multivariate linear regression of the tracer values in that element and  
 215 the neighboring source elements. If two source polygons jointly overlap with a particular destination polygon they are defined as being neighboring source elements. For the  $n_m$  neighbouring elements (including the element itself) the tracer gradients are given by

$$\nabla_{xt} = \frac{(YY)(XT) - (XY)(YT)}{(XX)(YY) - (XY)^2}, \quad (18)$$

and

$$220 \quad \nabla_{yt} = \frac{(XX)(YT) - (XY)(XT)}{(XX)(YY) - (XY)^2} \quad (19)$$

where

$$XX = \sum_m x_m x_m - \frac{1}{n_m} \sum_m x_m \sum_m x_m, \quad (20)$$

$$YY = \sum_m y_i y_m - \frac{1}{n_m} \sum_m y_m \sum_m y_m, \quad (21)$$

225

$$XY = \sum_m x_m y_m - \frac{1}{n_m} \sum_m x_m \sum_m y_m, \quad (22)$$

$$XT = \sum_m x_m t_m - \frac{1}{n_m} \sum_m x_m \sum_m t_m, \quad (23)$$

$$230 \quad YT = \sum_m y_m t_m - \frac{1}{n_m} \sum_m y_m \sum_m t_m, \quad (24)$$

where neighboring element  $m$  has position  $(x_m, y_m)$  and tracer value  $t_m$ . ~~If two source polygons jointly overlap with a particular destination polygon they are defined as being neighboring source elements.~~

Tracer gradients are limited with a form of van Leer limiting (van Leer, 1979) to preserve monotonicity of the tracer fields. Tracer gradients are limited so that the extrema values of the linear reconstructed tracer field,  $t_p(\mathbf{r})$ , within a source polygon  
 235 are within the range of tracers values for the surrounding neighbor source elements. These neighbor elements are defined in the same way as for the gradient calculation above. Since the extremal values of a linear reconstructed tracer field for a polygon are at the corners of that polygon, we use the minimum and maximum of the corner polygon tracer values of the reconstructed field,  $t_i^{cmin}$  and  $t_i^{cmax}$ , to perform the limiting. The gradients for a source element  $i$  are limited by multiplying them by a limiting coefficient,  $\alpha_i$ , which lies in the range  $[0,1]$  and whose value is given by

$$240 \quad \alpha_i = \min(1, \alpha_{min}, \alpha_{max}) \quad (25)$$

where

$$\alpha_{min} = \begin{cases} \max\left(0, \frac{t_i^{min} - t_i}{t_i^{cmin} - t_i}\right), & \text{if } |t_i^{cmin} - t_i| > |t_i^{min} - t_i| \\ 1, & \text{otherwise} \end{cases} \quad (26)$$

and

$$245 \quad \alpha_{max} = \begin{cases} \max\left(0, \frac{t_i^{max} - t_i}{t_i^{cmax} - t_i}\right), & \text{if } |t_i^{cmax} - t_i| > |t_i^{max} - t_i| \\ 1, & \text{otherwise} \end{cases} \quad (27)$$

where  $t_i^{min}$  and  $t_i^{max}$  are the minimum and maximum, respectively, of the tracer values of the surrounding neighbor source elements to source element  $i$ . This method restricts reconstructed tracer values of a given destination element,  $t_j$ , to be within the range of source tracer values for source elements that overlap with the destination element as well as source element neighbors of those source elements, as in the case for the incremental remapping algorithm. In addition, in a similar way gradients of the concentration fields for all the ice thickness categories are limited so that the sum of the reconstructed concentration over thickness categories lies within [0,1].

### 3.3 Integration over intersection polygons

With tracer gradients calculated and limited, conserved quantities can now be calculated from integrals of the reconstructed tracer fields across the intersection polygons. For destination polygon  $j$

$$A_{jk} = \sum_{ij} \underline{ij} e_{ij} \frac{1}{A_{P_{ij}}} \int_{A_{P_{ij}}} c_{\underline{p_{ik}}}^p(\mathbf{r}) dA, \quad (28)$$

$$V_{jk} = \sum_{ij} \underline{ij} e_{ij} \frac{1}{A_{P_{ij}}} \int_{A_{P_{ij}}} c_{\underline{p_{ik}}}^p(\mathbf{r}) h_{\underline{p_{ik}}}^p(\mathbf{r}) dA, \quad (29)$$

and

$$Q_{jkl} = \sum_{ij} \underline{ij} e_{ij} \frac{1}{A_{P_{ij}}} \int_{A_{P_{ij}}} c_{\underline{p_{ik}}}^p(\mathbf{r}) h_{\underline{p_{ik}}}^p(\mathbf{r}) q_{\underline{p_{ikl}}}^p(\mathbf{r}) dA, \quad (30)$$

where the sum is over ~~all intersections between destination element  $j$  and~~ source element distribution  $i$ , and the integral is over the  $ij$  intersection polygon area.  $e_{ij}$  is non-zero only when source polygon  $i$  overlaps destination polygon  $j$ . Finally, new remapped tracer values for the destination elements are determined with

$$c_{jk} = \frac{A_{jk}}{e_j}, \quad (31)$$

265

$$h_{jk} = \frac{V_{jk}}{e_j c_{jk}}, \quad (32)$$

and

$$q_{jkl} = \frac{Q_{jkl}}{e_j c_{jk} h_{jk}}. \quad (33)$$

Only destination elements with a remapped effective area greater than zero then need to be kept for the continuing DEM simulation. To ensure consistency for partially ice filled destination elements, before the final calculation of tracer values in equations 31 to 33, the effective area is set to the polygon area  $A_{p_j}$ , decreasing the concentration of sea ice calculated in equation 31. This is compatible with equation 8 since the values of effective area and concentration are not unique for

275 representing the physically relevant quantity of sea ice area within an element, given by  $A_i = c_i e_i$ . Provided the area of sea ice within an element remains fixed,  $0 < c_i \leq 1$ , and  $0 \leq e_i \leq A_p$ , the concentration and effective area can vary together without affecting the physical representation.

Instead of directly calculating the integrals over source and intersection polygon area required by the remapping method, the integrands of these integrals are expanded so that only integrals of geometric quantities of the source polygons are required. These quantities are calculated once for all tracers improving computational efficiency for simulations with large tracer number. For example equation 16 once expanded becomes

$$280 \quad \tilde{\mathbf{r}}_x = \frac{1}{cA} \left[ (c - \alpha_c \nabla c \cdot \bar{\mathbf{r}}) \int_A x dA + \right. \\ \left. (\alpha_c \nabla_x c) \int_A x^2 dA + \right. \\ \left. (\alpha_c \nabla_y c) \int_A xy dA \right], \quad (34)$$

and

$$285 \quad \tilde{\mathbf{r}}_y = \frac{1}{cA} \left[ (c - \alpha_c \nabla c \cdot \bar{\mathbf{r}}) \int_A y dA + \right. \\ \left. (\alpha_c \nabla_x c) \int_A xy dA + \right. \\ \left. (\alpha_c \nabla_y c) \int_A y^2 dA \right] \quad (35)$$

and only source polygon integrals of  $x$ ,  $y$ ,  $x^2$ ,  $y^2$ , and  $xy$  are required. The integrals are calculated by breaking polygons into triangles by connecting the polygon centroid to the polygon vertices and using the Gaussian triangular quadrature rules of Dunavant (1985).

### 290 3.4 Optimization-based flux correction to remapping

For uniform motion of the elements there is no relative motion (either rectilinear or rotational) between elements, so their polygons do not overlap during their motion. For general motion, however, relative motion between elements results in element polygons overlapping. For the formulation of effective area from Section 2, this would potentially result in the remapped effective area exceeding the available geometric area of the destination polygons, resulting in remapped concentrations greater than 1. To ameliorate this issue we implement a flux based optimization correction to the effective area and tracer fields that is applied after the remapping discussed above. This optimization scheme determines a minimal flux,  $f_{j_1, j_2}$ , between polygons  $j_1$  and  $j_2$  of the destination element distribution that conservatively removes excess effective area from destination polygons, so after the flux is applied to the remapped effective area and tracer fields the effective areas,  $e_{j_1}$  and  $e_{j_2}$ , are less than the



destination polygon areas,  $A_{P_{j_1}}$  and  $A_{P_{j_2}}$  for all destination polygons. For a given destination polygon  $P_{j_1}$  we require that the  
 300 corrected effective area,  $e'_{j_1}$ , obey

$$0 \leq e'_{j_1} \leq A_{P_{j_1}}. \quad (36)$$

The corrected effective area is given by

$$e'_{j_1} = e_{j_1} + \sum_{j_2} B_{j_1 j_2} f_{j_1 j_2} \quad (37)$$

where  $B_{j_1 j_2}$  is a sparse matrix with entries of either 0 (if polygons  $j_1$  and  $j_2$  do not share an edge), -1, or 1 (signifying whether  
 305 the flux  $f_{j_1 j_2}$  is into or out of the polygon  $j_1$ ). Thus the determination of the set of fluxes,  $f_{j_1}$ , can be cast in the following  
 inequality constrained quadratic program:

$$\begin{aligned} & \text{minimize} && \frac{1}{2} \mathbf{f}^T \mathbf{P} \mathbf{f} \\ & \text{subject to} && \mathbf{l} \leq \mathbf{B} \mathbf{f} \leq \mathbf{u} \end{aligned} \quad (38)$$

where  $\mathbf{f}$  is the vector of edge fluxes,  $f_{i_1 j_2}$ ,  $\mathbf{P}$  is the identity matrix,  $\mathbf{B}$  is the matrix  $B_{j_1 j_2}$ , and  $\mathbf{u}$  and  $\mathbf{l}$  are vectors defined by

$$l_j = -e_j \quad (39)$$

310 and

$$u_j = A_{P_j} - e_j. \quad (40)$$

The quadratic program is solved in parallel by the PermonQP library (Hapla et al., 2016; Kružík et al., 2020; Hapla et al.,  
 2021), which uses the PETSc library (Balay et al., 1997, 2019). The fluxes,  $f_{j_1 j_2}$ , are then used to conservatively transfer  
 effective area and tracer quantities between destination polygons, removing excess effective area. Since the fluxes are fluxes of  
 315 effective area, a conserved quantity,  $Z$ , is corrected according to

$$Z'_{j_1} = Z_{j_1} - Z_{j_1} \frac{f_{j_1 j_2}}{e_j}, \quad (41)$$

and

$$Z'_{j_2} = Z_{j_2} + Z_{j_1} \frac{f_{j_1 j_2}}{e_j} \quad (42)$$

for all values of  $\mathbf{f}$ , where  $f_{j_1 j_2}$  flows from element  $j_1$  to  $j_2$ .

320 Another issue ameliorated by the flux correction is the overlapping of source elements with coastal elements. Here we  
 represent coastlines through a series of immovable elements coincident with land. DEM models, however, model compressive  
 interaction through an overlap of elements, so sea ice elements pushed by winds onto fixed coastal elements will overlap  
 slightly with those elements. During the remapping described previously some sea ice will be remapped onto the coastal  
 elements. This can be fixed by moving this remapped ice to the nearest destination element that is not a coastal element before  
 325 the flux correction is performed. While moving this ice has the potential to increase the effective area of these elements to be  
 larger than their geometric area, the flux correction algorithm ameliorates this effect.

### 3.5 Effect of open water

One difference between particle and Eulerian methods that causes potential issues for remapping is the treatment of open water. In Eulerian methods, empty Eulerian cells, representing open water, can be included in the calculation of tracer gradients and monotonicity limits. For DEM ~~sea-ice-sea-ice~~ models, elements only exist where sea ice exists, with elements that lose all their ice being removed from the simulation. One advantage of this is that fewer elements are needed than Eulerian cells (which must cover the whole domain), increasing computational performance for the DEM model. Consequently, there are no empty elements representing open water to be included in tracer gradient calculations, or in the neighboring element tracer extrema used to limit those gradients. A possible effect of this is that tracer values for ice concentration and thickness,  $t_i$ , for elements at the ice pack edge are likely to be the minimum of the neighbour tracer values, so that  $t_i = t_{ij}^{min}$ . From equations 25 to 27 this would mean the gradients would be limited to zero in these ice edge elements, and the remapping here would revert to a highly diffusive first order method. To investigate the effect of this issue we implement a method to account for open water in the tracer gradient calculation and limiting. Firstly, for the neighboring source elements,  $N_i$ , of a given source element (not including the element itself) we calculate the total effective area,  $E_i$ , and the centroid of that effective area,  $\mathbf{r}_{E_i}$ . These are

330  
335  
340

$$E_i = \sum_i^{N_i} e_i \quad (43)$$

and

$$\mathbf{r}_{E_i} = \frac{1}{E} \sum_i^{N_i} e_i \mathbf{r}_i. \quad (44)$$

If the  $E_i$  is below some limit we assume that there is some open water surrounding the source element and include an additional open water neighbor pseudo-element into the gradient and gradient limiting calculations. This pseudo-element has zero concentration, and a position on the opposite side of the element to the centroid of the surrounding effective area ( $2\mathbf{r}_i - \mathbf{r}_{E_i}$ ). The addition of a neighbor concentration value of zero would prevent the gradient at the ice edge from being limited to zero. We include the zero concentration pseudo-element if the sea ice surrounding the element of interest is below a fraction (taken as 0.75) of an estimate of the expected value of  $E_i$  for a fully covered pack,  $E'_i$ . In two dimensions we estimate  $E'_i$  based on a hexagonal close packing of elements, so that  $E'_i \simeq 6\bar{A}_{P_j}$ , where  $\bar{A}_{P_j}$  is the mean area of destination polygons. In one dimension each element is only surrounded by two elements so for one dimensional tests we use  $E'_i \simeq 2\bar{A}_{P_j}$ .

345  
350

## 4 Computational results

We now test the remapping algorithm described in the previous section with a series of idealized test cases. Motion of the elements between remapping is determined by the LAMMPS (Plimpton, 1995) molecular dynamics code, which has the capability to run DEM simulations, wherein particle interaction forces are computed based on contacts, and the equations of motions are integrated in time. LAMMPS can either explicitly enforce the motion of elements (such as in uniform rectilinear

355

motion), or solve the equations of motion of the elements with a modified velocity Verlet integrator (Swope et al., 1982). For test cases involving solving the equations of motion, we solve a simplified sea-ice momentum equation

$$m \frac{\partial \mathbf{u}}{\partial t} = \mathbf{F} + \tau_a + \tau_w.$$

360 In ~~which in~~ a DEM context ~~, this~~ reduces to a set of coupled first-order equations for all elements:

$$m_i \frac{d\mathbf{u}_i}{dt} = \sum_j \mathbf{F}_{ij} + \tau_a(\mathbf{x}_i) + \tau_w(\mathbf{x}_i) \quad (45)$$

where  $m_i$  is the mass of each element,  $\mathbf{u}_i$  is the element velocity,  ~~$\mathbf{F}_i$  is the sum of contact forces~~  $\mathbf{F}_{ij}$  is the contact force on element  $i$  ~~from neighboring element  $j$~~ , and  $\tau_a$  and  $\tau_w$  are the atmospheric and ocean stresses, respectively, evaluated at the location of the element  $\mathbf{x}_i$ . ~~These~~ ~~To determine element rotation we also solve an angular momentum equation given by~~

$$365 \quad I_i \frac{d\omega_i}{dt} = \sum_j (\mathbf{r}_{ij} \times \mathbf{F}_{ij}) \quad (46)$$

~~where  $I_i$  is the moment of inertia of element  $i$ ,  $\omega_i$  is the element angular velocity, and  $(\mathbf{r}_{ij} \times \mathbf{F}_{ij})$  is the torque on element  $i$  produced by the contact force with element  $j$ , and  $\mathbf{r}_{ij}$  is the contact position between elements  $i$  and  $j$  relative to the centre of mass of element  $i$ . The~~ surface stresses have a quadratic form given by

$$\tau = e c_{a,w} \rho_{a,w} |\mathbf{U}_{a,w} - \mathbf{u}| \left( \mathbf{U}_{a,w} - \mathbf{u} \right) \quad (47)$$

370 where  $e$  is the effective element area,  ~~$e c_{a,w}$~~  is a drag coefficient,  ~~$\rho_{a,w}$~~  is the fluid density (air or water), and  ~~$\mathbf{U}$ ,  $\mathbf{U}_{a,w}$~~  is the fluid velocity (atmospheric wind or ocean current), subscript  $a$  refers to air and subscript  $w$  refers to water. This momentum equation is discretized in time as

$$m \frac{\mathbf{u}^n - \mathbf{u}^{n-1}}{\Delta t} = \mathbf{F}_{n-1} + e c_a \rho_a |\mathbf{U}_a - \mathbf{u}^{n-1}| (\mathbf{U}_a - \mathbf{u}^{n-1}) + e c_w \rho_w |\mathbf{U}_w - \mathbf{u}^{n-1}| (\mathbf{U}_w - \mathbf{u}^n) \quad (48)$$

380 where superscripts  $n$  and  $n - 1$  signify the current and previous time steps, respectively. ~~The, and the~~ ocean velocity is treated partly implicitly for stability, ~~and~~. ~~For the test cases considered here~~ a simple Hookean elastic repulsion contact model is employed ~~for element collision for the test cases considered here~~ with velocity damping in both the normal and tangential contact directions. ~~While the Hookean contact model has several limitations, such as sensitivity to the time step and to the time stepping method used, it is sufficient to demonstrate the efficacy of the remapping method.~~ The air drag coefficient,  $c_a$ , and air density,  $\rho_a$ , are given by 0.0012 and 1.3 kg m<sup>-3</sup>, respectively (Hibler, 1979), while the ocean drag coefficient,  $c_w$ , and water density,  $\rho_w$  are given by of 0.00536 and 1026 kg m<sup>-3</sup> (Kim et al., 2006), respectively.

## 4.1 One dimensional uniform motion

The first test we perform is a simple one dimensional test case with uniform motion and a “top hat” initial ice concentration distribution. The destination element distribution consists of uniform elements with radius,  $r$ , of 500 m arranged in the  $x$  direction across a domain 1000 km long. The domain accommodates a single element in the  $y$  direction and is 1 km wide. The initial source distribution is a subset of the destination distribution consisting of the 100 elements between 100 km and 200 km in the  $x$  direction. Initial ice concentration,  $c_0(x)$ , is given by

$$c_0(x) = \begin{cases} 1, & \text{for } x_1 \leq x \leq x_2 \\ 0, & \text{otherwise.} \end{cases} \quad (49)$$

where  $x_1$  and  $x_2$  are 100 km and 200 km, respectively.

These elements have an initial effective area of a square of side  $2r$ , a sea-ice concentration of 1 and a sea-ice thickness of 1 m. The elements undergo uniform motion of  $500 \text{ m s}^{-1}$  in the positive  $x$  direction, so that after 200 seconds the distribution has moved for a total of 100 km km of translation, whereupon the final source distribution is examined. Figure 2 shows this final distribution for three situations. The first situation (“No remap” in Figure 2) has no remapping performed during the uniform motion so that the final distribution of ice concentration and thickness is the same as the initial one, other than being translated 100 km in the positive  $x$  direction. For the second situation (“Low order” in Figure 2) the source distribution undergoes remapping every second for a total of 200 remappings. With these values the elements move half their diameter before remapping (500 m) before remapping, and undergo a total of 200 remappings, resulting in the 100 km total translation. Tracer gradients are set to zero so that the remapping algorithm becomes a low order method. The final situation (“Higher order” in Figure 2) is the same as the “Low order” situation except tracer gradients are not set to zero, making the remapping a more accurate higher order method. The “No remap” situation is useful for demonstrating the final distribution that a perfect remapping scheme, with no numerical diffusion, would produce. Figure 2 shows that the “Higher order” method produces significantly less numerical diffusion of the concentration profile than the “Low order” method.

We now use this test case to explore the effect of taking account of open water in the tracer gradient and limiting, as described in section 3.5. We rerun the “Higher order” simulation with and without the effects of open water taken into account (see Figure 3). As can be seen in Figure 3 the effect of the absence of open water elements appears negligible with only a very minor amount of extra numerical diffusion present at the very edge of the ice due to this absence (see inset in Figure 3b). Similar results were found with the two dimensional simulations described next. Based on these results we neglect the effect of the absence of open water elements for the remainder of this work.

The next one dimensional test case is based on that found in Lipscomb and Hunke (2001), and is used to test how well the remapping algorithm preserves the compatibility of the particle tracers. The test case is the same as the previous one dimensional test case, except for the initial distribution of ice concentration, thickness and volume. These initial distributions are more complex than the previous test case (see Figure 4a,b) and provide a harder test of compatibility. Initial ice concentration,

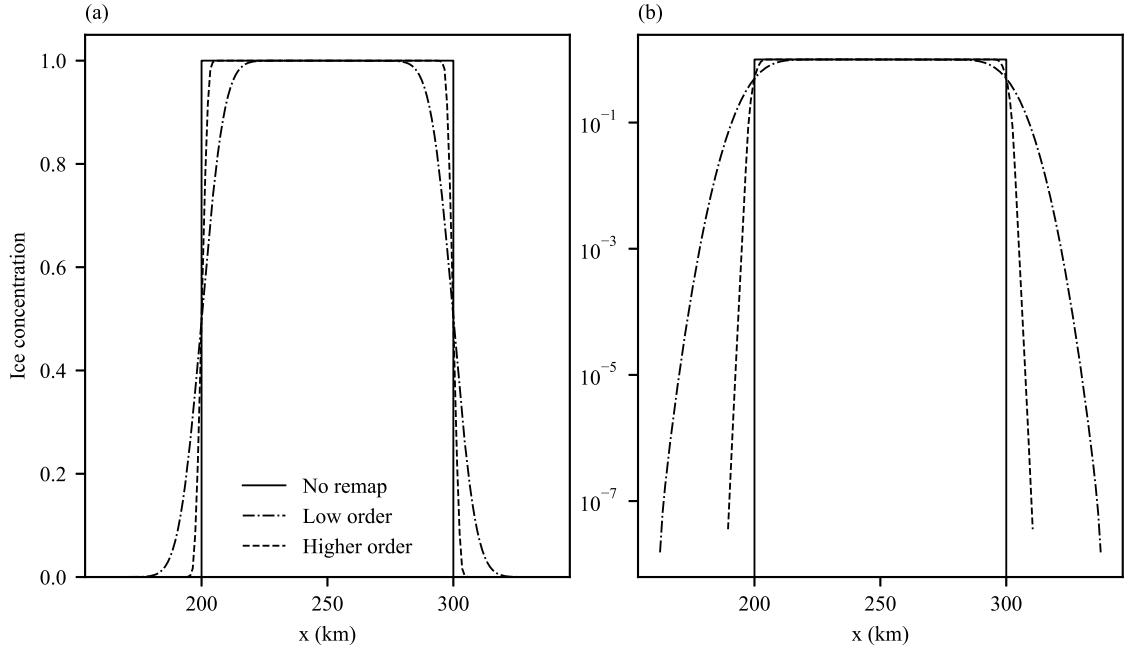

**Figure 2.** (a) Final ice concentration for the one dimensional top hat test case. (*solid*): No remapping, (*dash-dot*): Low order remapping, (*dashed*): Higher order remapping. (b) As (a) but with a logarithmic ordinate axis. Results for no remapping, low order remapping, and higher order remapping are shown.

$c_0(x)$ , and thickness,  $h_0(x)$ , are given by

$$415 \quad c_0(x) = \begin{cases} \frac{x-x_1}{x_3-x_1}, & \text{for } x_1 \leq x \leq x_3 \\ 1, & \text{for } x_3 \leq x \leq x_5 \\ 0, & \text{otherwise.} \end{cases} \quad (50)$$

and

$$h_0(x) = \begin{cases} 0.25, & \text{for } x_2 \leq x \leq x_4 \\ 1, & \text{for } (x_1 \leq x < x_2) \text{ or } (x_4 < x \leq x_5) \end{cases} \quad (51)$$

where  $x_1, x_2, x_3, x_4$ , and  $x_5$  are given by 100 km, 112.5 km, 150 km, 187.5 km, and 200 km respectively. As before we pre-  
 420 form three separate simulations: One with no remapping (Figure 4a,b), one with low order remapping (Figure 4c,d), and one  
 with higher order remapping (Figure 4e,f). As before both the low and higher order remapping schemes are capable of remapping  
 the initial particle distribution, with the higher order scheme producing much less numerical diffusion. Figures 4d,f also  
 clearly show that the thickness tracer preserves monotonicity as well as the concentration and volume, clearly demonstrating  
 compatibility of the method.

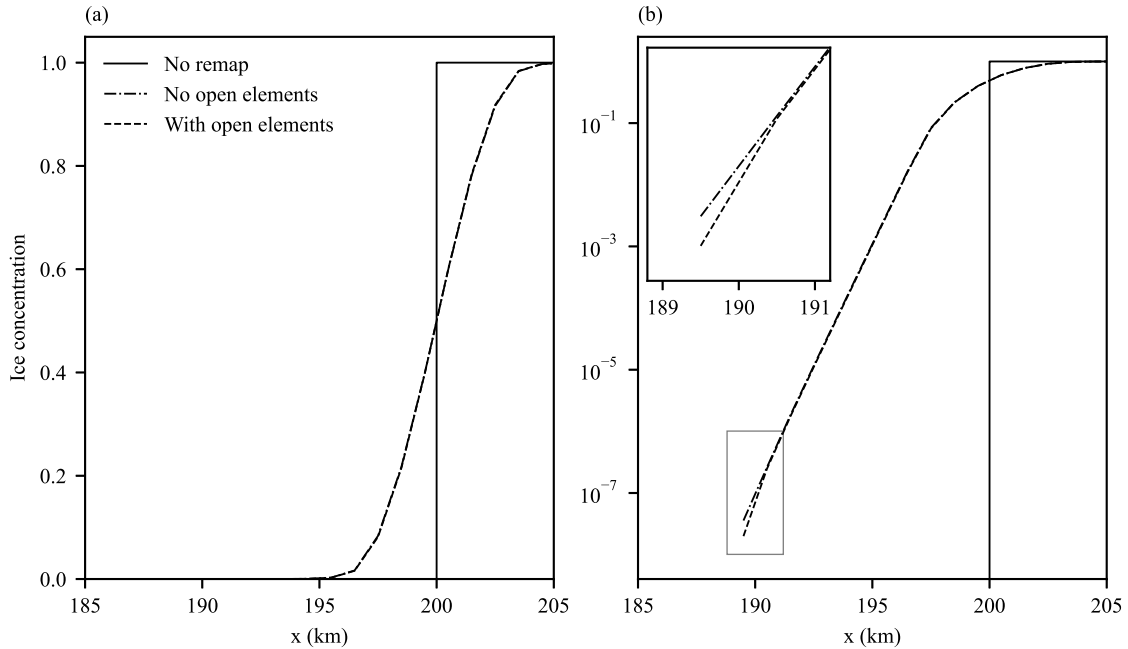

**Figure 3.** (a) Detail of ice concentration for the top hat test case showing the higher order remapping results with and without taking into account the effect of open water. (b) As (a) but with a logarithmic ordinate axis. The inset shows detail of the differences at the extreme of the distribution.

## 4.2 Two dimensional uniform motion

425 The next test case we examine involves a two dimensional domain of size 300 km in the  $x$  direction and 100 km size in the  $y$  direction. The destination and initial source element distributions consist of a random arrangement of circular elements with a distribution of element radius, with mean radius  $\sim 513$  m. To create the tightly packed initial element distribution we use the method of Liang et al. (2015). This method uses a Lloyd (1982) like iteration of the radical Voronoi tessellation of an initial random set of generator points each with an assigned radius drawn from a distribution. During each iteration the generator locations are moved to the centers of the largest inscribed circles within the radical Voronoi polygons (see Figure 1

430 for an example element distribution generated with this method). We explore two different initial source element distributions discussed in Lipscomb and Ringler (2005). The first is a cosine bell distribution with an initial ice concentration,  $c_0(x, y)$ , given by

$$c_0(x, y) = \begin{cases} \frac{1}{2} \left( 1 + \cos \left( \frac{\pi r}{r_0} \right) \right), & r < r_0 \\ 0, & \text{otherwise.} \end{cases} \quad (52)$$

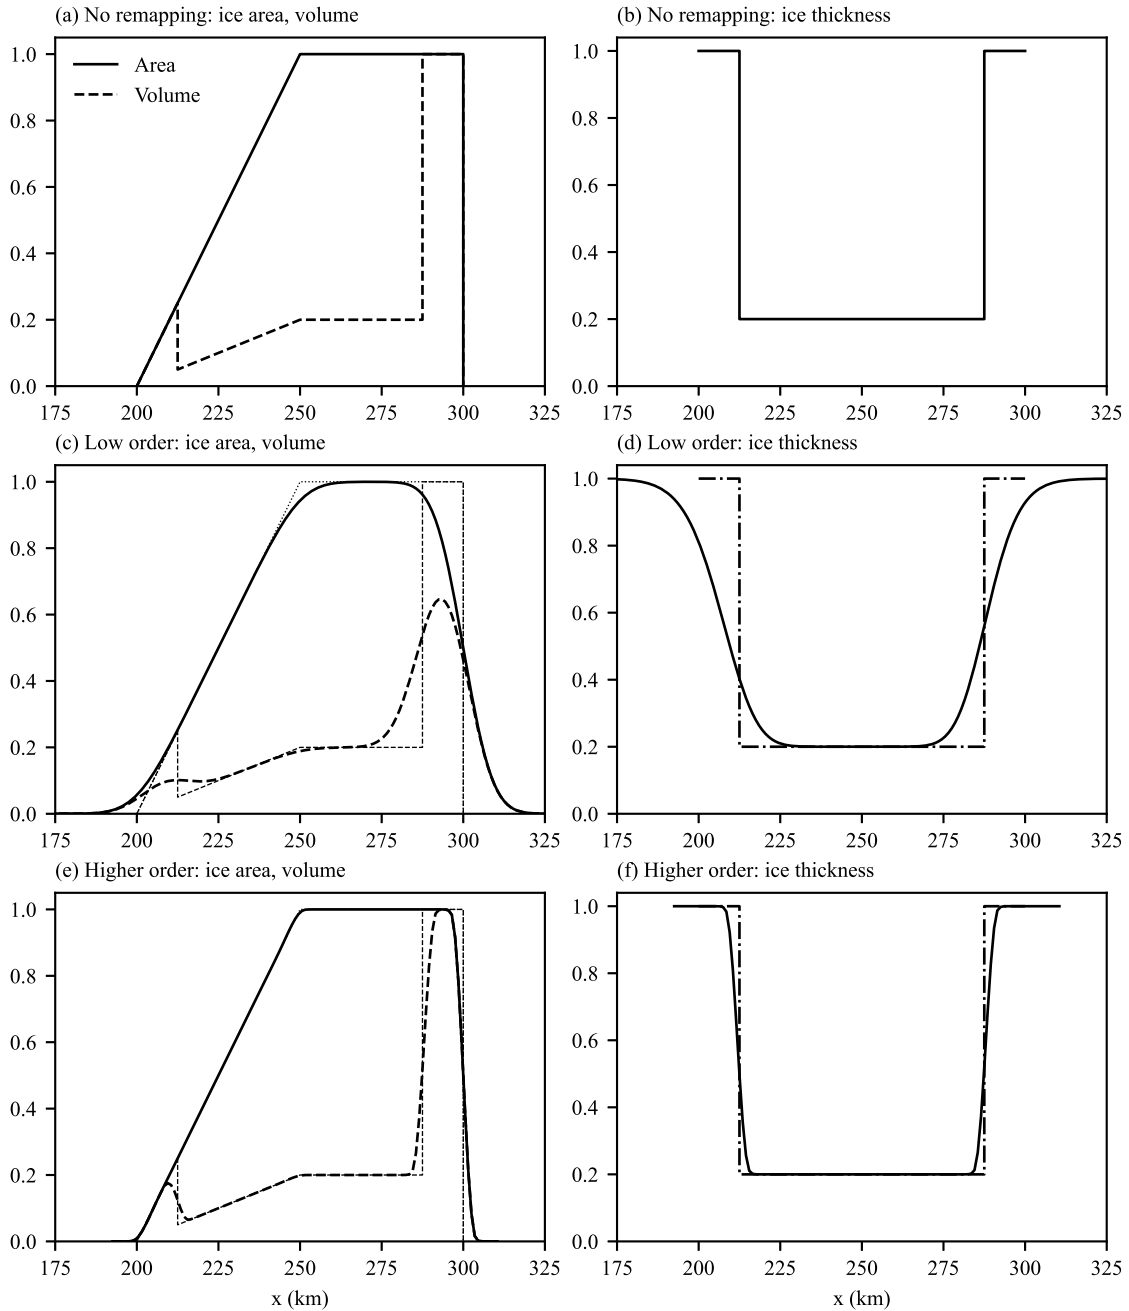

**Figure 4.** One dimensional compatibility test case. (a, b): No remapping, (c, d): Low order remapping, (e, f): Higher order remapping. (a, c, e): Ice concentration, and volume, (b, d, f): Ice thickness.

435 where  $r = \sqrt{(x - x_0)^2 + (y - y_0)^2}$ ,  $(x_0, y_0)$  is the center of the cosine bell at (25 km, 50 km), and  $r_0$  is the radius of the cosine bell with size 15 km. The second is a slotted cylinder with an initial ice concentration,  $c_0(x, y)$ , given by

$$c_0(x, y) = \begin{cases} 1, & (r < r_0) \text{ and not} \\ & ( (|x - x_0| < \frac{1}{6}r_0) \text{ and } (y - y_0) > -\frac{2}{3}r_0 ) \\ 0, & \text{otherwise.} \end{cases} \quad (53)$$

where  $x_0, y_0$ , and  $r_0$  are the same as for the cosine bell distribution. Elements on the edge of the slotted cylinder are assigned an  
 440 initial concentration according to their areal fraction within the slotted cylinder. The element distributions are moved uniformly in the  $x$  direction ~~with speed 500 m s<sup>-1</sup>~~ and examined after ~~200 seconds~~ 100 km of translation. As before we perform three simulations, one with no remapping, one with low order remapping and one with higher order remapping, with remapping performed every ~~second~~ 500 m of translation for a total of 200 remappings. Spatial maps of the element concentration at the end of the simulation are shown in Figure 5. The higher order remapping scheme is able to preserve the approximate shape  
 445 of the initial concentration distributions while high numerical diffusion with the low order remapping scheme leaves the final element distribution more spread out with any structure of the slotted cylinder lost. The difference in numerical diffusion of the two remapping methods is evident in cross sections of final ice concentration through the middle of the distributions, as shown in Figure 6. As can be seen almost no trace of the slot in the slotted cylinder is present for the low order scheme, while the slot is preserved well for the higher order method.

450 Next we study the error scaling properties of the remapping method. To do this we create various initial element distributions with different mean particle radii, but the same relative distribution of radii. We rerun the simulations for these element distributions and record the  $L_2$  error norm for each simulation. We calculate the  $L_2$  error norm as

$$L_2 = \frac{\sum_i e_i \sqrt{c_i - c_i^0}}{\sum_i e_i \sqrt{c_i^0}} \quad (54)$$

where the sum is over the final element distribution,  $e_i$  and  $c_i$  are the effective area and concentration of the final distribution  
 455 and  $c_i^0$  is the ice concentration for no remapping. In Figure 7, the values of the  $L_2$  error norm are plotted against the mean radius of the element distribution for both the cosine bell and slotted cylinder initial distributions and the low and higher order remapping methods. As can be seen from the figure the higher order method has significantly lower errors than the low order method for both initial distributions. The gradient of the slope for the smooth cosine bell distribution is also much higher than the slotted cylinder with its sharp discontinuities. It is also apparent that for the smooth cosine bell distribution the remapping  
 460 method is approximately second order accurate for the higher order method.

### 4.3 Flux correction tests

Having demonstrated in sections 4.1 and 4.2 that the higher order remapping method for uniform motion is capable of remapping the particle distribution with low numerical diffusion while preserving compatibility, we next turn to examining the effect of non-uniform motion and testing the ability of the flux correction algorithm described in section 3.4 to correct the issues



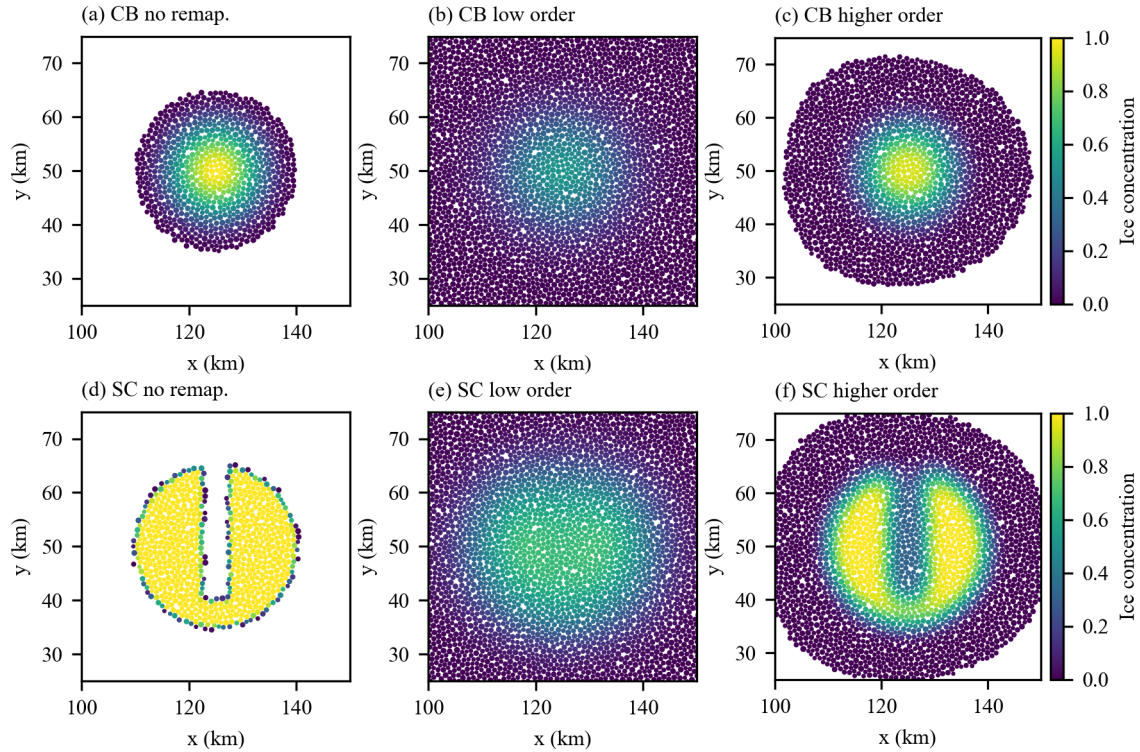

**Figure 5.** Final ice concentration ([fraction of elements covered in sea ice](#)) for the two dimensional remapping test case with an initial cosine bell (CB: a, b, c) and slotted cylinder (SC: d, e, f) particle distribution. (a, d): No remapping, (b, e): Low order remapping, (c, f): Higher order remapping.

465 created by this motion. The first test we examine is a variation of the two dimensional test used in the previous section. Instead of making the elements undergo uniform motion, we fix their positions and randomize the orientations of their associated polygons before each remapping. This introduces the overlaps and gaps between source polygons that might be expected from a general motion of the elements. As before, a total of 200 remappings are performed before the concentration distributions are examined. Figures 8b and e show the effect of these randomized orientations on the remapped ice concentration for the higher

470 order remapping scheme. As can be seen, while the general shape of the initial distributions is preserved, the randomization results in ice concentrations significantly larger than one for some elements (where elements overlapped) and ice concentration less than that expected for others (from gaps in the polygon distribution), with these effects taking on a random nature. Clearly, without correction this effect would have a seriously detrimental effect for any sea-ice simulation. Figures 8c and f show the same final ice concentration distribution, but generated with the flux correction scheme described in section 3.4 proceeding

475 remapping. Now, ice concentrations are bounded correctly by  $[0,1]$ , and the final distribution is smooth with similar results to that obtained in section 4.2. [Exactly the same result is not expected as the distribution of particles for remapping is different and the remapping method tested in section 4.2 does not require the flux correction scheme. However, the similarity in the results](#)

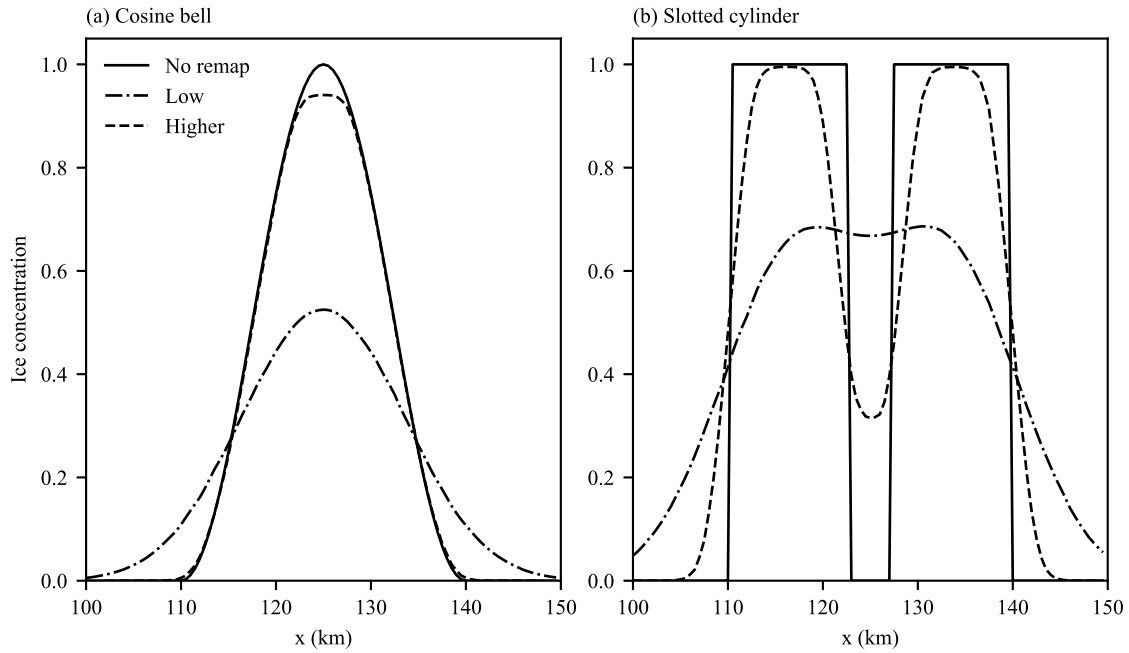

**Figure 6.** Cross section ( $y = 50$  km) of ice concentration for the two dimensional test case for the initial (a) cosine bell, and (b) slotted cylinder particle distributions. Results for no remapping, low order remapping, and higher order remapping are shown.

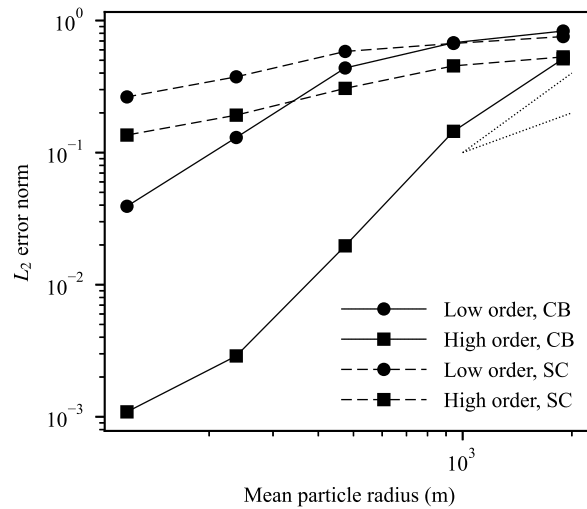

**Figure 7.**  $L_2$  error norm versus mean particle radius for the cosine bell (CB) and slotted cylinder (SC) two dimensional test cases with both low and higher order remapping. First and second order convergence gradients are also shown as the dotted lines.

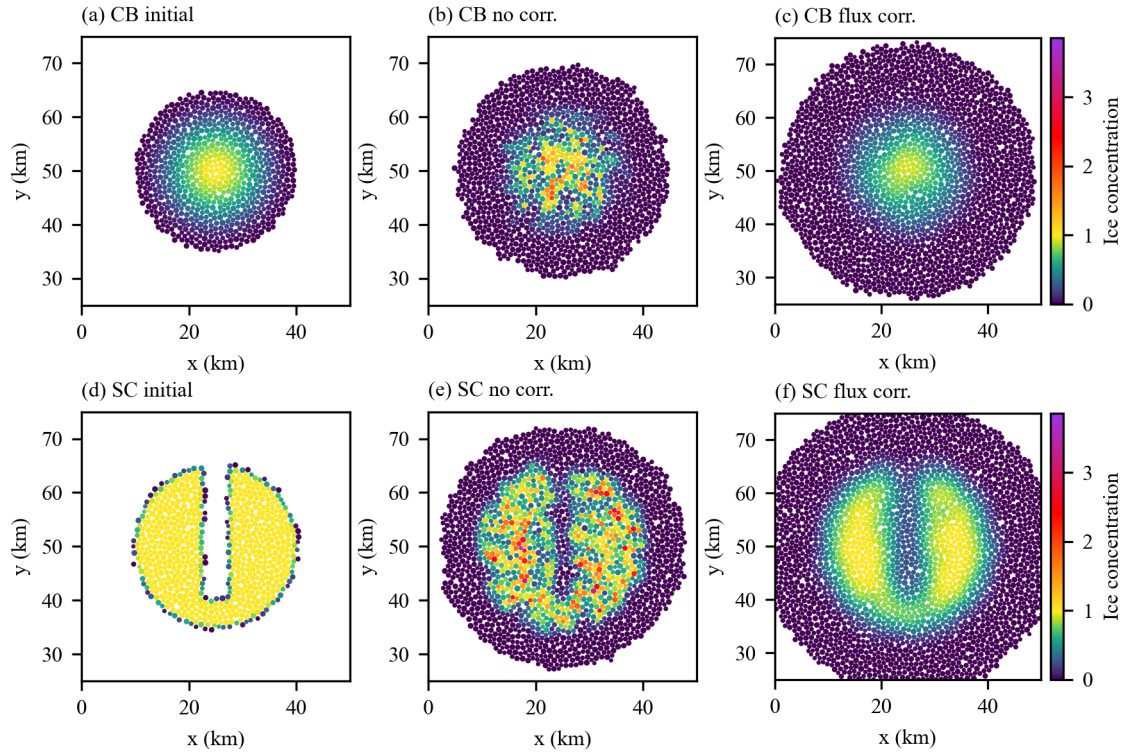

**Figure 8.** Stationary two dimensional remapping test case with randomization of element orientations for cosine bell (CB: a, b, c) and slotted cylinder (SC: d, e, f) initial distributions. Shown are the initial [sea-ice concentration](#) distributions (a and d), results without flux correction (b and e), and results with flux correction (c and f).

[indicates that the flux correction scheme works effectively and does not introduce significantly more numerical diffusion.](#) This is also evident in the cross section of ice concentration shown in Figure 9. Repeating the  $L_2$  error scaling analysis in the previous section (Figure 10) shows the larger  $L_2$  error norms for the uncorrected simulations, while the flux corrected simulations show significantly lower errors, and also show second order convergence with mean particle size for the smooth cosine bell test case.

To demonstrate the effect of the flux correction in more realistic situations we present two more test cases. In the first, adapted from Lipscomb et al. (2007), we have a square domain of size 1000 km by 1000 km with a random distribution of elements covering the domain generated by the algorithm of Liang et al. (2015). In the middle of the domain is an ‘L’ shaped island consisting of fixed coastal elements. Initial elements are coastal or sea-ice elements according to

```

if ( $x > x_0$  and  $x \leq x_1$  and  $y > y_0$  and  $y \leq y_1$ ) and not ( $x > x_0$  and  $x \leq x_2$  and  $y > y_0$  and  $y \leq y_2$ ) then
    Coastal element
else
490   Sea-ice element

```

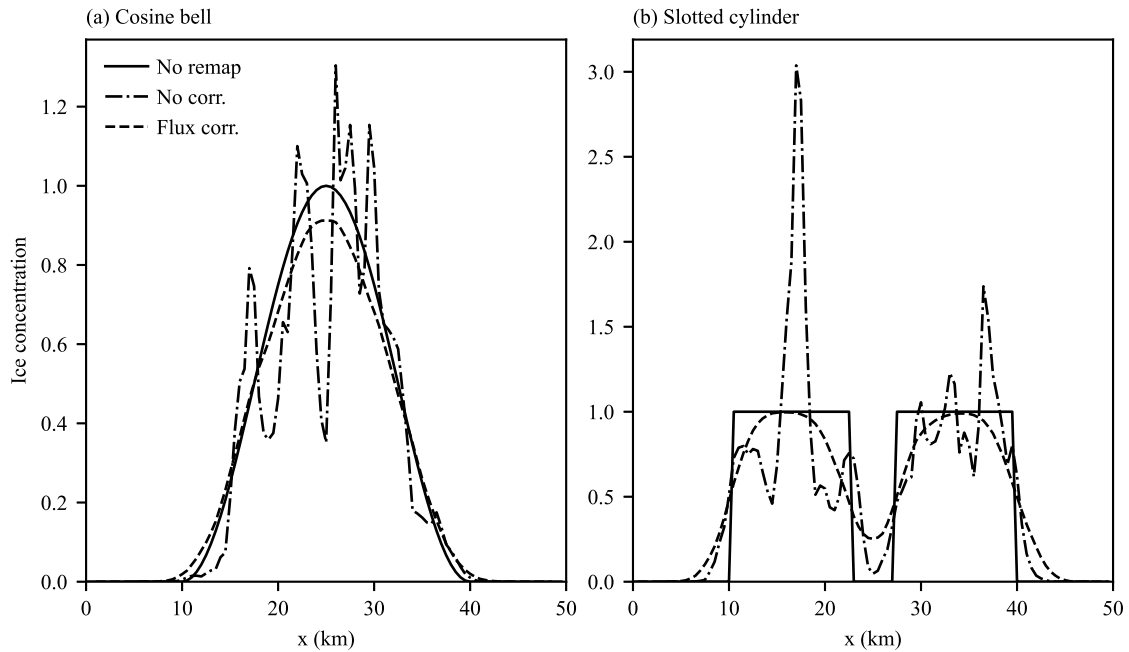

**Figure 9.** Cross section ( $y = 50$  km) of ice concentration for the stationary two dimensional test case with randomized orientations for the initial (a) cosine bell, and (b) slotted cylinder particle distributions.

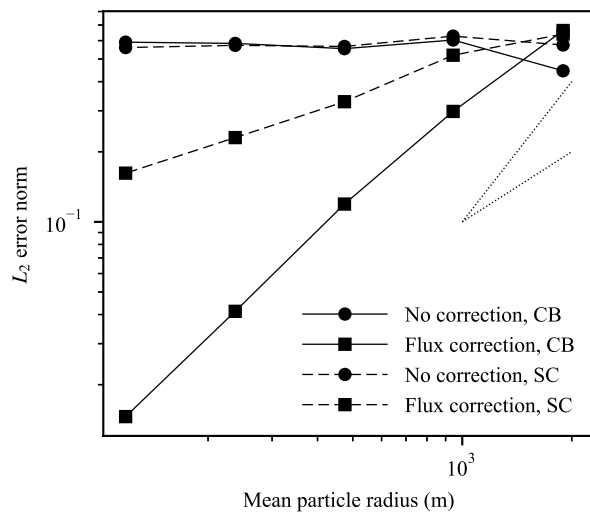

**Figure 10.**  $L_2$  error norm versus mean particle radius for the cosine bell (CB) and slotted cylinder (SC) stationary two dimensional test cases with randomized orientations with both low and higher order remapping. First and second order convergence gradients are also shown as the dotted lines.

**end if**

where  $(x, y)$  is the position of the element center,  $x_0$  and  $y_0$  equal 400 km,  $x_1$  and  $y_1$  equal 600 km, and  $x_2$  and  $y_2$  equal 550 km. Elements have a mean element radius of  $\sim 10$  km, with non-coastal elements having a concentration of one everywhere. A constant wind forcing is applied to the elements with the  $x$  and  $y$  components of wind velocity both equal to  $10 \text{ m s}^{-1}$ ,  
495 while the ocean is stationary. During the simulation the elements flow around the island leaving an open water wake behind it. [Since the contact model used here consists of elastic repulsion without a representation of ridging, ice does not build up on the windward side of the island.](#) The simulation is run for 2 days after which the element distribution is remapped to the destination element distribution with the higher order scheme and either with or without the flux correction algorithm. Figure 11a and b show the effect on ice concentration of remapping without and with the flux correction, respectively. Figure 11c and d show  
500 the same but with a value of one subtracted from the ice concentration to highlight the excess ice concentration generated by the remapping when the flux correction is not used. These figures clearly show elements with concentration greater than one after remapping without flux correction and also show how the flux correction removes this excess concentration and results in a concentration field closer to the concentration field before remapping with a concentration of one most places within the pack. [Elements on the edge of the ice pack and the edge of the island wake have concentrations less than one, since during the](#)  
505 [remapping these elements were not fully covered by source elements.](#)

The final test case we examine is that from Flato (1993). Here the domain consists of a 500 km by 500 km closed square with the upper half ( $y > 250$  km) initially filled with elements with a concentration of one and a mean radius of  $\sim 2.5$  km. The elements have the same air and ocean stress formulation and the same elastic repulsion contact model as the previous island test case. The ocean, again, is stationary but the wind field,  $\mathbf{U}_a$ , takes the form of a vortex with

$$510 \quad \mathbf{U}_a(\mathbf{r}) = \min \left\{ \omega |\mathbf{r}|, \frac{\lambda}{|\mathbf{r}|} \right\} \left( \mathbf{k} \times \frac{\mathbf{r}}{|\mathbf{r}|} \right) \quad (55)$$

where  $\mathbf{r}$  is the position vector relative to the center of the vortex at (250 km, 200 km),  $\omega$  is  $0.5 \times 10^{-3} \text{ s}^{-1}$ ,  $\lambda$  is  $8 \times 10^5 \text{ m}^2 \text{ s}^{-1}$ , and  $\mathbf{k}$  is the unit vertical vector. The simulation is run for 2 days and then the element distribution is remapped. As for the island test case, Figure 12 shows that the flux correction scheme is capable of removing excess concentration caused by more realistic non-uniform motion of the elements for this test case.

## 515 **5 Conclusions**

Modeling sea ice dynamics with the discrete element method has the potential to enable the capture of the anisotropic deformation and fracture seen in observational data that is difficult to reproduce in continuum models. The DEM models, however, present a challenge due to convergence and overlap of the Lagrangian elements in simulations. To manage this element clustering, a deformed element distribution is periodically remapped to an undeformed distribution. This paper presents a geometric-  
520 based remapping algorithm designed to address the unique challenges of accurately remapping sea ice tracer fields for circular discrete elements. In particular, the method includes a representation of effective element area defined with a radical Voronoi tessellation for the undeformed element configuration that enables an accurate definition of area conservation in the case of

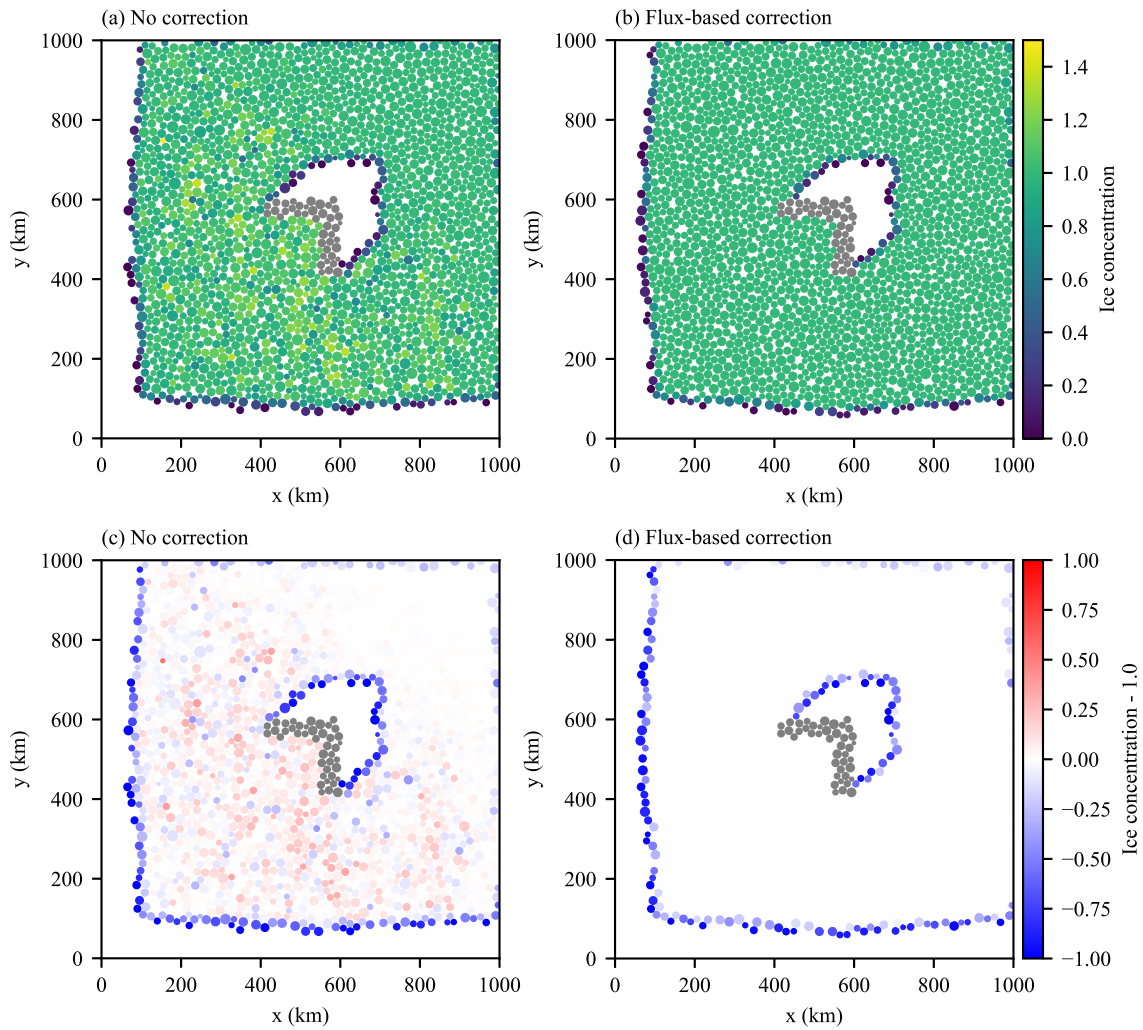

**Figure 11.** Island test case showing remapping without any correction (a, c) and with the flux based correction (b, d). (a, b) show ice concentration, while (c, d) show the difference from a an ice concentration of 1.0. Coastal elements comprising the central island are shown in grey.

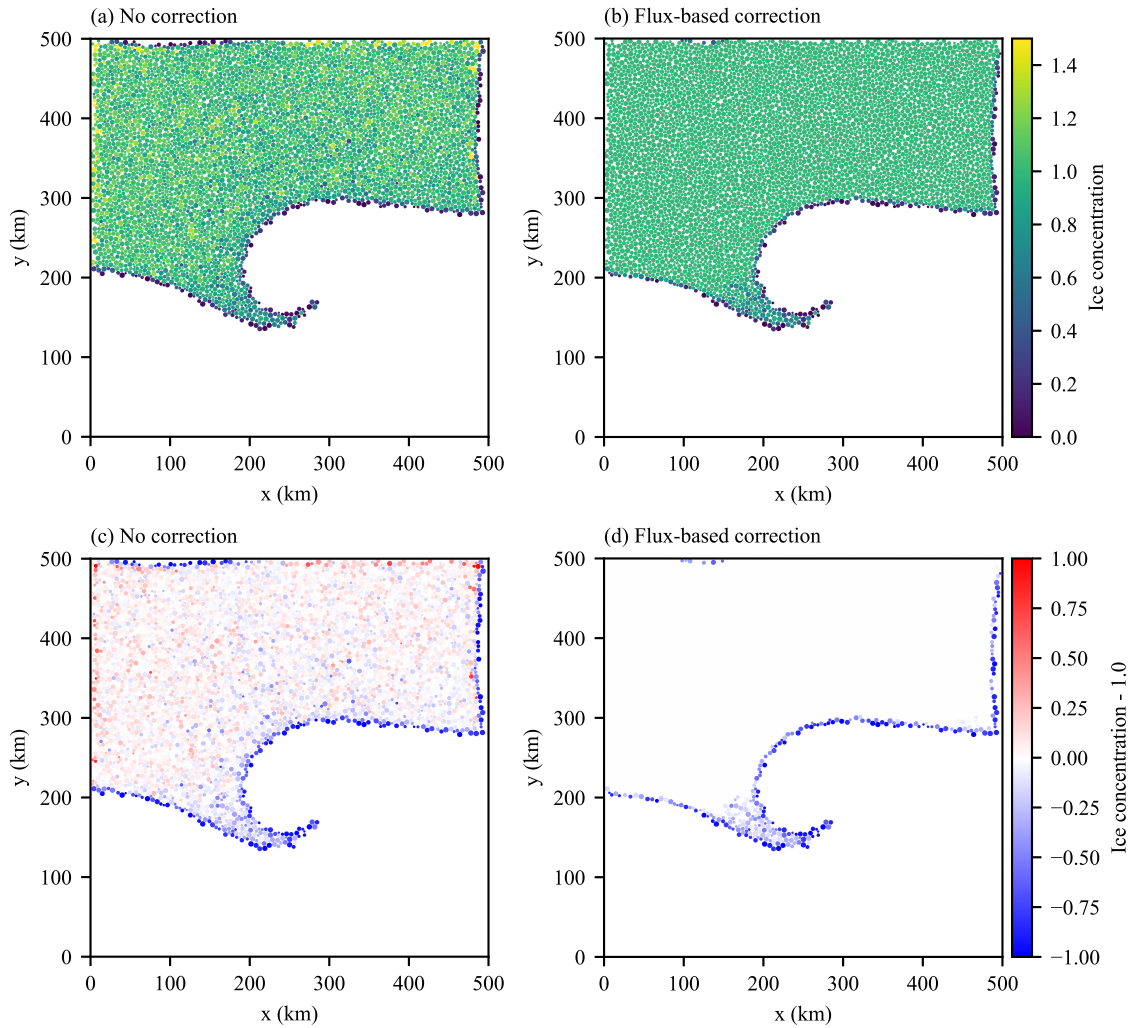

**Figure 12.** Vortex test case showing remapping without any correction (a, c) and with the flux based correction (b, d). (a, b) show ice concentration, while (c, d) show the difference from a an ice concentration of 1.0.



100% sea ice concentration. Our remapping approach builds on conservative, bounds preserving, and compatible algorithms developed for incremental remapping and applied to sea ice (Lipscomb and Hunke (2001); Lipscomb and Ringler (2005)). In the case of uniform motion, the effective element area enables a complete coverage of the ice domain without overlap and the method inherits the properties of the incremental remapping algorithms. In the case of non-uniform motion, where gaps and overlaps occur between the deformed effective element areas, monotonicity can be lost. To address this, we developed a novel flux-based correction method, which maintains conservation while correcting for bounds violations due to overlapping elements. Numerical examples are provided that demonstrate the second-order accuracy of the method, bounds preservation for both uniform and non-uniform motion, and compatibility between primitive and conserved tracer quantities.

*Code availability.* The code and test cases used in this paper can be found at <http://doi.org/10.5281/zenodo.4918956>.

*Author contributions.* AKT developed the methodology of the remapping scheme and the remapping software. AKT also implemented the test cases and performed model validation and analysis. KJP contributed to the remapping methodology and software development, as well as model analysis. DB integrated the LAMMPS model into the remainder of the code. AKT and KJP wrote this manuscript with DB contributing to the editing of the manuscript. All authors contributed to funding acquisition.

*Competing interests.* The authors declare that they have no conflict of interest.

*Acknowledgements.* This material is based upon work supported by the U.S. Department of Energy, Office of Science, Office of Advanced Scientific Computing Research and Office of Biological and Environmental Research, Scientific Discovery through Advanced Computing (SciDAC) program. The authors wish to thank the PermonQP team for help in using the PermonQP library, and Andrew Roberts for contributing to the writing of the SciDAC DEMSI proposals. Sandia National Laboratories is a multi-mission laboratory managed and operated by National Technology and Engineering Solutions of Sandia, LLC., a wholly owned subsidiary of Honeywell International, Inc., for the U.S. Department of Energy's National Nuclear Security Administration under contract DE-NA0003525. This paper describes objective technical results and analysis. Any subjective views or opinions that might be expressed in the paper do not necessarily represent the views of the U.S. Department of Energy or the U.S. Government.



## 545 References

- Balay, S., Gropp, W. D., McInnes, L. C., and Smith, B. F.: Efficient Management of Parallelism in Object Oriented Numerical Software Libraries, in: *Modern Software Tools in Scientific Computing*, edited by Arge, E., Bruaset, A. M., and Langtangen, H. P., pp. 163–202, Birkhäuser Press, 1997.
- Balay, S., Abhyankar, S., Adams, M. F., Brown, J., Brune, P., Buschelman, K., Dalcin, L., Eijkhout, V., Gropp, W. D., Karpeyev, D., Kaushik, D., Knepley, M. G., May, D. A., McInnes, L. C., Mills, R. T., Munson, T., Rupp, K., Sanan, P., Smith, B. F., Zampini, S., Zhang, H., and Zhang, H.: PETSc Users Manual, Tech. Rep. ANL-95/11 - Revision 3.11, Argonne National Laboratory, 2019.
- 550 Bochev, P., Ridzal, D., and Shashkov, M.: Fast optimization-based conservative remap of scalar fields through aggregate mass transfer, *Journal of Computational Physics*, 246, 37–57, <https://doi.org/10.1016/j.jcp.2013.03.040>, 2013.
- Bochev, P., Ridzal, D., and Peterson, K.: Optimization-based remap and transport: A divide and conquer strategy for feature-preserving discretizations, *J. Comp. Physics*, 257, Part B, 1113–1139, <https://doi.org/10.1016/j.jcp.2013.03.057>, 2014.
- 555 Dukowicz, J. K. and Baumgardner, J. R.: Incremental Remapping as a Transport/Advection Algorithm, *Journal of Computational Physics*, 160, 318–335, <https://doi.org/10.1006/jcph.2000.6465>, 2000.
- Dunavant, D. A.: High degree efficient symmetrical Gaussian quadrature rules for the triangle, *International Journal for Numerical Methods in Engineering*, 21, 1129–1148, <https://doi.org/10.1002/nme.1620210612>, 1985.
- 560 Flato, G. M.: A particle-in-cell sea-ice model, *Atmosphere-Ocean*, 31, 339–358, <https://doi.org/10.1080/07055900.1993.9649475>, 1993.
- Gutfraind, R. and Savage, S. B.: Flow of fractured ice through wedge-shaped channels: smoothed particle hydrodynamics and discrete-element simulations, *Mechanics of Materials*, 29, 1–17, [https://doi.org/10.1016/S0167-6636\(97\)00072-0](https://doi.org/10.1016/S0167-6636(97)00072-0), 1998.
- Hapla, V., Horák, D., Pospíšil, L., Čermák, M., Vašatová, A., and Sojka, R.: Solving Contact Mechanics Problems with PERMON, in: *High Performance Computing in Science and Engineering*, vol. 9611 of *Lecture Notes in Computer Science*, pp. 101–115, Springer International Publishing Switzerland, [https://doi.org/10.1007/978-3-319-40361-8\\_7](https://doi.org/10.1007/978-3-319-40361-8_7), 2016.
- 565 Hapla, V., Horák, D., Kružík, J., Pecha, M., Čermák, M., Pospíšil, L., et al.: PERMON Web page, <http://permon.vsb.cz/>, 2021.
- Herman, A.: Molecular-dynamics simulation of clustering processes in sea-ice floes, *Phys. Rev. E*, 84, 056 104, <https://doi.org/10.1103/PhysRevE.84.056104>, 2011.
- Herman, A.: Wave-induced stress and breaking of sea ice in a coupled hydrodynamic discrete-element wave–ice model, *The Cryosphere*, 11, 2711–2725, <https://doi.org/10.5194/tc-11-2711-2017>, 2017.
- 570 Hibler, W. D.: A Dynamic Thermodynamic Sea Ice Model, *Journal of Physical Oceanography*, 9, 815–846, [https://doi.org/10.1175/1520-0485\(1979\)009<0815:ADTSIM>2.0.CO;2](https://doi.org/10.1175/1520-0485(1979)009<0815:ADTSIM>2.0.CO;2), 1979.
- Hockney, R., Goel, S., and Eastwood, J.: Quiet high-resolution computer models of a plasma, *Journal of Computational Physics*, 14, 148–158, [https://doi.org/10.1016/0021-9991\(74\)90010-2](https://doi.org/10.1016/0021-9991(74)90010-2), 1974.
- 575 Hopkins, M.: A discrete element Lagrangian sea ice model, *Engineering Computations*, 21, 409–421, <https://doi.org/10.1108/02644400410519857>, 2004.
- Hopkins, M. A.: On the ridging of intact lead ice, *Journal of Geophysical Research: Oceans*, 99, 16 351–16 360, <https://doi.org/10.1029/94JC00996>, 1994.
- Hopkins, M. A.: On the mesoscale interaction of lead ice and floes, *Journal of Geophysical Research: Oceans*, 101, 18 315–18 326, <https://doi.org/https://doi.org/10.1029/96JC01689>, 1996.
- 580

- Hopkins, M. A. and Thorndike, A. S.: Floe formation in Arctic sea ice, *Journal of Geophysical Research: Oceans*, 111, C11S23, <https://doi.org/10.1029/2005JC003352>, 2006.
- Hunke, E. C., Lipscomb, W. H., Turner, A. K., Jeffery, N., and Elliott, S.: CICE: the Los Alamos sea ice model documentation and software user's manual version 5.1, Tech. rep., Los Alamos National Laboratory, 2015.
- 585 Imai, H., Iri, M., and Murota, K.: Voronoi Diagram in the Laguerre Geometry and Its Applications, *SIAM Journal on Computing*, 14, 93–105, <https://doi.org/10.1137/0214006>, 1985.
- Ingram, W. J., Wilson, C. A., and Mitchell, J. F. B.: Modeling climate change: An assessment of sea ice and surface albedo feedbacks, *Journal of Geophysical Research: Atmospheres*, 94, 8609–8622, <https://doi.org/10.1029/JD094iD06p08609>, 1989.
- Jones, P. W.: First- and Second-Order Conservative Remapping Schemes for Grids in Spherical Coordinates, *Monthly Weather Review*, 127, 2204–2210, [https://doi.org/10.1175/1520-0493\(1999\)127<2204:FASOCR>2.0.CO;2](https://doi.org/10.1175/1520-0493(1999)127<2204:FASOCR>2.0.CO;2), 1999.
- 590 Killworth, P. D.: Deep convection in the World Ocean, *Reviews of Geophysics*, 21, 1–26, <https://doi.org/10.1029/RG021i001p00001>, 1983.
- Kim, J. G., Hunke, E. C., and Lipscomb, W. H.: Sensitivity analysis and parameter tuning scheme for global sea-ice modeling, *Ocean Modelling*, 14, 61–80, <https://doi.org/10.1016/j.ocemod.2006.03.003>, 2006.
- Kružík, J., Horák, D., Čermák, M., Pospíšil, L., and Pecha, M.: Active set expansion strategies in MPRGP algorithm, *Advances in Engineering Software*, 149, 102 895, <https://doi.org/10.1016/j.advengsoft.2020.102895>, 2020.
- 595 Lauritzen, P. H., Nair, R. D., and Ullrich, P. A.: A conservative semi-Lagrangian multi-tracer transport scheme (CSLAM) on the cubed-sphere grid, *Journal of Computational Physics*, 229, 1401–1424, <https://doi.org/10.1016/j.jcp.2009.10.036>, 2010.
- Liang, G., Lu, L., Chen, Z., and Yang, C.: Poisson disk sampling through disk packing, *Comp. Visual Media*, 1, 17–26, <https://doi.org/10.1007/s41095-015-0003-7>, 2015.
- 600 Lipscomb, W. H. and Hunke, E. C.: Modeling Sea Ice Transport Using Incremental Remapping, *Monthly Weather Review*, 132, 1341–1354, [https://doi.org/10.1175/1520-0493\(2004\)132<1341:MSITUI>2.0.CO;2](https://doi.org/10.1175/1520-0493(2004)132<1341:MSITUI>2.0.CO;2), 2001.
- Lipscomb, W. H. and Ringler, T. D.: An Incremental Remapping Transport Scheme on a Spherical Geodesic Grid, *Monthly Weather Review*, 133, 2335–2350, <https://doi.org/10.1175/MWR2983.1>, 2005.
- Lipscomb, W. H., Hunke, E. C., Maslowski, W., and Jakacki, J.: Ridging, strength, and stability in high-resolution sea ice models, *Journal of Geophysical Research: Oceans*, 112, C03S91, <https://doi.org/10.1029/2005JC003355>, 2007.
- 605 Liska, R., Shashkov, M., Váchal, P., and Wendroff, B.: Optimization-based synchronized flux-corrected conservative interpolation (remapping) of mass and momentum for arbitrary Lagrangian-Eulerian methods, *J. Comput. Phys.*, 229, 1467–1497, <https://doi.org/10.1016/j.jcp.2009.10.039>, 2010.
- Lloyd, S.: Least squares quantization in PCM, *IEEE Transactions on Information Theory*, 28, 129–137, <https://doi.org/10.1109/TIT.1982.1056489>, 1982.
- 610 Margolin, L. G. and Shashkov, M.: Second-order sign-preserving conservative interpolation (remapping) on general grids., *Journal of Computational Physics*, 184, 266–298, [https://doi.org/10.1016/S0021-9991\(02\)00033-5](https://doi.org/10.1016/S0021-9991(02)00033-5), 2003.
- Petersen, M. R., Asay-Davis, X. S., Berres, A. S., Chen, Q., Feige, N., Hoffman, M. J., Jacobsen, D. W., Jones, P. W., Maltrud, M. E., Price, S. F., Ringler, T. D., Streletz, G. J., Turner, A. K., Van Roedel, L. P., Veneziani, M., Wolfe, J. D., Wolfram, P. J., and Woodring, J. L.: An Evaluation of the Ocean and Sea Ice Climate of E3SM Using MPAS and Interannual CORE-II Forcing, *Journal of Advances in Modeling Earth Systems*, 11, 1438–1458, <https://doi.org/10.1029/2018MS001373>, 2019.
- Plimpton, S.: Fast Parallel Algorithms for Short-Range Molecular Dynamics, *Journal of Computational Physics*, 117, 1–19, <https://doi.org/10.1006/jcph.1995.1039>, 1995.

- 620 Preparata, F. P. and Shamos, M. I.: Computational Geometry: An introduction, Springer-Verlag, Berlin, <https://doi.org/10.1007/978-1-4612-1098-6>, 1985.
- Rampal, P., Bouillon, S., Ólason, E., and Morlighem, M.: neXtSIM: a new Lagrangian sea ice model, *The Cryosphere*, 10, 1055–1073, <https://doi.org/10.5194/tc-10-1055-2016>, 2016.
- Rousset, C., Vancoppenolle, M., Madec, G., Fichefet, T., Flavoni, S., Barthélemy, A., Benschila, R., Chanut, J., Levy, C., Masson, S., and Vivier, F.: The Louvain-La-Neuve sea ice model LIM3.6: global and regional capabilities, *Geoscientific Model Development*, 8, 2991–3005, <https://doi.org/10.5194/gmd-8-2991-2015>, 2015.
- 625 Shire, T., Hanley, K. J., and Stratford, K.: DEM simulations of polydisperse media: efficient contact detection applied to investigate the quasi-static limit, *Computational Particle Mechanics*, pp. 1–11, <https://doi.org/10.1007/s40571-020-00361-2>, 2020.
- Swope, W. C., Andersen, H. C., Berens, P. H., and Wilson, K. R.: A computer simulation method for the calculation of equilibrium constants for the formation of physical clusters of molecules: Application to small water clusters, *The Journal of Chemical Physics*, 76, 637–649, <https://doi.org/10.1063/1.442716>, 1982.
- 630 Tuhkuri, J. and Polojärvi, A.: A review of discrete element simulation of ice–structure interaction, *Phil. Trans. R. Soc. A.*, 376, 20170 335, <https://doi.org/10.1098/rsta.2017.0335>, 2018.
- Ullrich, P. A., Lauritzen, P. H., and Jablonowski, C.: Geometrically Exact Conservative Remapping (GECORE): Regular latitude-longitude and cubed-sphere grids, *Monthly Weather Review*, 137, 1721–1741, <https://doi.org/10.1175/2008MWR2817.1>, 2009.
- 635 van den Berg, M., Lubbad, R., and Løset, S.: An implicit time-stepping scheme and an improved contact model for ice-structure interaction simulations, *Cold Regions Science and Technology*, 155, 193–213, <https://doi.org/https://doi.org/10.1016/j.coldregions.2018.07.001>, 2018.
- van den Berg, M., Lubbad, R., and Løset, S.: The effect of ice floe shape on the load experienced by vertical-sided structures interacting with a broken ice field, *Marine Structures*, 65, 229–248, <https://doi.org/https://doi.org/10.1016/j.marstruc.2019.01.011>, 2019.
- 640 van Leer, B.: Towards the ultimate conservative difference scheme. V. A second-order sequel to Godunov’s method, *Journal of Computational Physics*, 32, 101–136, [https://doi.org/10.1016/0021-9991\(79\)90145-1](https://doi.org/10.1016/0021-9991(79)90145-1), 1979.
- Xu, Z., Tartakovsky, A. M., and Pan, W.: Discrete-element model for the interaction between ocean waves and sea ice, *Phys. Rev. E*, 85, 016 703, <https://doi.org/10.1103/PhysRevE.85.016703>, 2012.
